# Supplementary material
Source: PubMed Central journal article supplement (PMC3857308)

## Synthesis of Cyclic Guanidines via Pd-Catalyzed Alkene Carboamination

Blane P. Zavesky, Nicholas R. Babij, Jonathan A. Fritz and John P. Wolfe\*

Department of Chemistry, University of Michigan, 930 N. University Avenue, Ann Arbor, Michigan 48109-1055

### Supporting Information

Experimental procedures and characterization data for new compounds in Tables 1–3 and Equations 1–2.

#### Table of Contents

|                                                                               |     |
|-------------------------------------------------------------------------------|-----|
| General Considerations                                                        | S1  |
| Preparation and Characterization of Guanidine Substrates                      | S2  |
| Preparation and Characterization of Cyclic Guanidine Products                 | S7  |
| Deprotection of Cyclic Guanidine Product <b>18</b>                            | S18 |
| Structural Assignment of Deprotected Cyclic Guanidine Product <b>27</b>       | S18 |
| Stereochemical Analysis of Enantioenriched Cyclic Guanidine Product <b>18</b> | S20 |
| References                                                                    | S23 |
| Copies of NMR Spectra                                                         | S24 |

**General:** All reactions were carried out under a nitrogen atmosphere in flame-dried glassware unless otherwise noted. Tris(dibenzylidene)acetone dipalladium and Nixantphos were purchased from Strem Chemical Co. and used without purification. All other reagents were obtained from commercial sources and were used as obtained unless otherwise noted. (*Z*)-1-bromobutene<sup>1</sup> was prepared according to a slight modification of a literature procedure; the preparation was conducted at rt instead of using microwave heating. *N*-methylbut-2-en-1-ylamine was prepared as a 7:1 mixture of *E*:*Z* alkene isomers according to a published procedure.<sup>2</sup> Sodium *tert*-butoxide was kept in a glove box and removed only prior to use. Toluene, THF, diethyl ether and dichloromethane were purified using a GlassContour solvent purification system. Yields refer to isolated yields of compounds estimated to be ≥95% pure as determined by <sup>1</sup>H NMR analysis unless otherwise noted. The yields reported in the supporting information describe the result of a single experiment, whereas isolated yields reported in Tables 1–3 and Equation 1 are averages of yields for two or more experiments. Thus, the yields reported in the supporting information may differ from those shown in Tables 1–3 and Equation 1.

## Preparation and Characterization of Guanidine Substrates

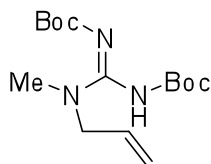

***N*<sup>1</sup>-Allyl-*N*<sup>2</sup>,*N*<sup>3</sup>-Bis(*tert*-butoxycarbonyl)-*N*<sup>1</sup>-methylguanidine (3).** The title compound was prepared using the general guanylation procedure reported by Lipton.<sup>3</sup> A flame-dried flask equipped with a stirbar was cooled under a stream of N<sub>2</sub>, and charged with *N,N'*-bis-Boc-thiourea (1.79 g, 6.45 mmol), dichloromethane (65 mL), *N*-methylallylamine (518 μL, 5.4 mmol), triethylamine (1.66 mL, 11.9 mmol), and *N*-methyl-2-chloropyridinium iodide (1.64 g, 6.42 mmol). The resulting solution was stirred overnight (16 h) at rt. Water was added to the reaction flask, the mixture was stirred at rt for 5 min, then was transferred to a separatory funnel. The layers were separated and the organic layer was dried over anhydrous sodium sulfate, filtered, and concentrated *in vacuo*. The crude material was purified by flash chromatography on silica gel to afford 660 mg (39%) of the title compound as a white solid: mp = 71–74 °C. This compound was found to exist as a mixture of rotamers as judged by <sup>1</sup>H and <sup>13</sup>C NMR analysis; data are for the mixture. <sup>1</sup>H NMR (700 MHz, CDCl<sub>3</sub>) δ 10.05 (s, 1 H), 5.86–5.81 (m, 1 H), 5.26–5.21 (m, 2 H), 4.08 (s, br, 2 H), 2.96 (s, 3 H), 1.49 (s, 18 H); <sup>13</sup>C NMR (175 MHz, CDCl<sub>3</sub>) δ 182.0, 162.6, 155.9, 151.2, 132.7, 118.5, 84.2, 81.9, 79.4, 53.4, 36.4, 28.1, 27.9; IR (film) 3286, 3175, 1748, 1612 cm<sup>-1</sup>. MS (ESI) 314.2073 (314.2074 calcd for C<sub>15</sub>H<sub>27</sub>N<sub>3</sub>O<sub>4</sub>, M + H<sup>+</sup>).

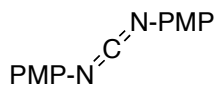

***N,N'*-Methanediylidene-bis-(4-methoxyaniline) (S1).** The title compound was prepared using a procedure published by Coppola.<sup>4</sup> A flame-dried flask was cooled under a stream of N<sub>2</sub>, charged with 1,3-bis(4-methoxyphenyl)thiourea (5.67 g, 19.6 mmol), 4-dimethylaminopyridine (96.0 mg, 0.786 mmol), methanesulfonyl chloride (1.7 mL, 21.6 mmol), triethylamine (8.2 mL, 58.9 mmol), and dichloromethane (196 mL, 0.1 M). The resulting solution was stirred at 0 °C for 5 min. The solution was then filtered through a plug of silica gel, and the silica gel was washed with 300 mL of a 1:1 mixture of ethyl acetate and hexanes. The filtrate was concentrated *in vacuo*. The crude material was purified by flash chromatography on silica gel to afford 3.98 g (80%) of the title compound as a white solid. Spectroscopic properties were identical to those

previously reported:<sup>5</sup> mp = 48–50 °C (lit.<sup>5</sup> mp = 48–50 °C). <sup>1</sup>H NMR (400 MHz, CDCl<sub>3</sub>) δ 7.11 (d, *J* = 8.8 Hz, 4 H), 6.85 (d, *J* = 8.8 Hz, 4 H), 3.80 (s, 6 H).

**General Procedure for Synthesis of Bis(4-methoxyphenyl)guanidine Substrates.** The bis(4-methoxyphenyl)guanidine derivatives were synthesized using a modification of a procedure published by Xi.<sup>6</sup> A flame dried round-bottom flask equipped with a stirbar was cooled under a stream of N<sub>2</sub>, and charged with *N,N'*-methanediylidene-bis-(4-methoxyaniline) (1.0 equiv), the appropriate amine (1.2 equiv), zinc chloride (1 equiv), dichloromethane (0.025 M), and diethyl ether (0.25 M). The resulting mixture was stirred overnight at rt, then was filtered through a plug of celite, and the celite plug was washed with dichloromethane (150 mL). The filtrate was washed with 1M aqueous HCl (5 mL/mmol) and saturated aqueous sodium chloride (5 mL/mmol). The organic layer was then concentrated *in vacuo* and the resulting crude product was purified by flash chromatography on silica gel.

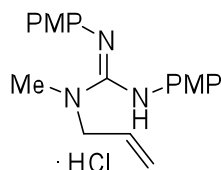

**1-Allyl-2,3-bis(4-methoxyphenyl)-1-methylguanidine hydrochloride (4).** The title compound was prepared from *N,N'*-methanediylidene-bis-(4-methoxyaniline) (1.68 g, 6.61 mmol) and *N*-methylallylamine (0.8 mL, 7.93 mmol) according to the general procedure. This procedure afforded 1.43 g (60%) of the title compound as a white foam solid: mp = 77–79 °C. <sup>1</sup>H NMR (500 MHz, CDCl<sub>3</sub>) δ 10.03 (s, 2 H), 7.00 (d, *J* = 9.0 Hz, 4 H), 6.55 (d, *J* = 8.0 Hz, 4 H), 5.88–5.78 (m, 1 H), 5.31–5.21 (m, 2 H), 4.13 (s, 2 H), 3.64 (s, 6 H), 3.08 (s, 3 H); <sup>13</sup>C NMR (125 MHz, CDCl<sub>3</sub>) δ 157.0, 154.2, 131.4, 129.7, 123.7, 120.3, 114.1, 55.4, 55.3, 38.1; IR (film) 3203, 1625 cm<sup>-1</sup>. MS (ESI) 326.1863 (326.1866 calcd for C<sub>19</sub>H<sub>24</sub>N<sub>3</sub>O<sub>2</sub>, M<sup>+</sup>).

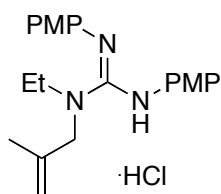

**1-Ethyl-2,3-bis(4-methoxyphenyl)-1-(2-methylallyl)guanidine hydrochloride (9).** The title compound was prepared from *N,N'*-methanediylidene-bis-(4-methoxyaniline) (2.06 g, 8.09 mmol) and *N*-ethyl-2-methylallylamine (1.28 mL, 9.7 mmol) according to the general procedure except the *N*-ethyl-2-methylallylamine was filtered through a plug of silica gel prior to addition, and the silica plug was eluted with 5 mL of dichloromethane, which was added to the reaction mixture. This procedure afforded 2.43 g (73%) of the title compound as a white foam solid: mp = 68 °C. <sup>1</sup>H NMR (500 MHz, CDCl<sub>3</sub>) δ 6.92 (d, *J* = 8.0 Hz, 4 H), 6.56 (d, *J* = 8.0 Hz, 4 H), 4.99 (s, 1 H), 4.92 (s, 1 H), 4.09 (s, 2 H), 3.66 (s, 6 H), 3.63–3.58 (m, 2 H), 1.74 (s, 3 H), 1.17 (t, *J* = 7.0 Hz, 3 H); <sup>13</sup>C NMR (175 MHz, CDCl<sub>3</sub>) δ 156.8, 153.9, 139.7, 129.9, 123.6, 114.5, 114.0, 55.9, 55.3, 45.4, 20.3, 13.2; IR (film) 3040, 1619 cm<sup>-1</sup>. MS (ESI) 354.2180 (354.2176 calcd for C<sub>21</sub>H<sub>28</sub>N<sub>3</sub>O<sub>2</sub>, M<sup>+</sup>).

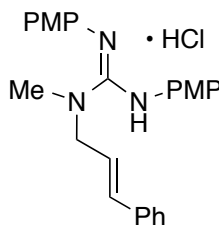

**1-Cinnamyl-2,3-bis(4-methoxyphenyl)-1-methylguanidine hydrochloride (10a).** The title compound was prepared from commercially available cinnamyl bromide via a two-step procedure. A round-bottom flask equipped with a stirbar was charged with cinnamyl bromide (5.9 g, 30 mmol) and ethanol (30 mL) and cooled to 0 °C. Methylamine (37.5 mL, 300 mmol, 33% solution in ethanol) was slowly added to the reaction flask over the course of 10 min. The reaction mixture was allowed to warm to rt and was stirred overnight. The reaction mixture was concentrated, dissolved in dichloromethane (100 mL), and transferred to a separatory funnel. 1 M HCl (20 mL) was added to the separatory funnel and the layers were separated. The organic layer was washed again with 1 M HCl (20 mL). The combined aqueous layers were transferred to a round-bottom flask and dichloromethane (50 mL) was added. The biphasic mixture was basified with NH<sub>4</sub>OH to pH > 12, and transferred to a separatory funnel. The layers were separated and the aqueous layer was extracted with dichloromethane (3 x 15 mL). The combined organic layers were dried over anhydrous sodium sulfate, filtered, and concentrated.

*in vacuo*. The crude *N*-methylcinnamylamine was then coupled with *N,N'*-methanediylidene-bis-(4-methoxyaniline) (4.3 g, 17.0 mmol) according to the general procedure described above. This procedure afforded 1.82 g (27%) of the title compound as a off-white solid: mp = 84–89 °C. <sup>1</sup>H NMR (500 MHz, CDCl<sub>3</sub>) δ 8.70 (s, br, 2 H), 7.33–7.20 (m, 5 H), 7.18 (d, *J* = 9.0 Hz, 4 H), 6.75 (d, *J* = 8.5 Hz, 4 H), 6.49 (d, *J* = 16.5 Hz, 1 H), 6.02–5.97 (m, 1 H), 4.15 (s, br, 2 H), 3.67 (s, 6 H), 2.99 (s, 3 H); <sup>13</sup>C NMR (175 MHz, CDCl<sub>3</sub>) δ 157.6, 154.8, 135.8, 135.6, 129.3, 128.6, 128.1, 126.7, 124.4, 121.6, 114.7, 55.4, 54.9, 37.7; IR (film) 3256, 3205, 1627 cm<sup>-1</sup>. MS (ESI) 402.2176 (402.2176 calcd for C<sub>25</sub>H<sub>28</sub>N<sub>3</sub>O<sub>2</sub>, M<sup>+</sup>).

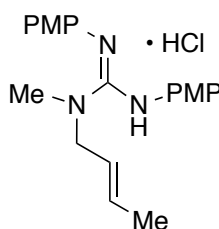

**1-(But-2-en-1-yl)-2,3-bis(4-methoxyphenyl)-1-methylguanidine hydrochloride (10b).** The title compound was prepared from *N,N'*-methanediylidene-bis-(4-methoxyaniline) (778 mg, 3.06 mmol) and *N*-methylbut-2-en-1-amine (employed as a 7:1 mixture of *E:Z* alkene isomers and as a 20% solution in EtOH) (260 mg, 3.06 mmol, 1.0 equiv,) according to the general procedure. After purification by flash column chromatography, 448 mg (39%) of the title compound was obtained as a pale brown solid (mp: 58–63 °C) and as a 7:1 mixture of *E:Z* alkene isomers as determined by <sup>1</sup>H NMR analysis. The <sup>1</sup>H data contains dichloromethane which was difficult to remove *in vacuo*. The data is for the mixture. <sup>1</sup>H NMR (500 MHz, CDCl<sub>3</sub>) δ 8.57 (s, 2 H), 7.17–7.13 (m, 4 H), 6.81–6.78 (m, 4 H), 5.73–5.66 (m, 1 H), 5.37–5.32 (m, 1 H), 3.93 (d, *J* = 5 Hz, 2 H), 3.73 (s, 6 H), 2.92 (s, 3 H), 1.69 (d, *J* = 5.5 Hz, 3 H); <sup>13</sup>C NMR (125 MHz, CDCl<sub>3</sub>) δ 157.7, 157.4, 154.5, 133.0, 131.2, 129.3, 125.0, 124.3, 123.1, 114.7, 114.7, 55.5, 55.5, 54.7, 37.6, 17.8; IR (film) 3247, 2954, 1627 cm<sup>-1</sup>. MS (ESI) 340.2019 (340.2020 calcd for C<sub>20</sub>H<sub>25</sub>N<sub>3</sub>O<sub>2</sub>, M<sup>+</sup>).

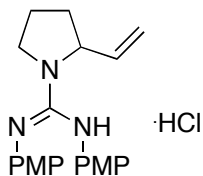

**(±)-*N,N'*-Bis(4-methoxyphenyl)-2-vinylpyrrolidine-1-carboximidamide hydrochloride (11).** The title compound was prepared from commercially available *N*-Boc-2-vinylpyrrolidine via a

two-step procedure. A round-bottom flask equipped with a stirbar was charged with *N*-Boc-2-vinylpyrrolidine (2.5 mL, 12.5 mmol) and dichloromethane (25 mL). Trifluoroacetic acid (12.5 mL, 1.0 M) was added to the flask and the mixture was stirred at rt for 1 h until the starting material had been completely consumed as judged by TLC analysis. The solution was diluted with water, basified with  $\text{NH}_4\text{OH}$  to  $\text{pH} > 12$ , and transferred to a separatory funnel. The layers were separated and the aqueous layer was extracted with dichloromethane (3 x 10 mL). The combined organic layers were dried over anhydrous sodium sulfate, filtered, and concentrated *in vacuo*. The crude amine was then coupled with *N,N'*-methanediylidene-bis-(4-methoxyaniline) (3.2 g, 12.5 mmol) according to the general procedure described above. This procedure afforded 464 mg (10%) of the title compound as a pale yellow solid: mp = 58–62 °C.  $^1\text{H}$  NMR (700 MHz,  $\text{CD}_3\text{OD}$ )  $\delta$  7.00 (d,  $J = 9.1$  Hz, 4 H), 6.82 (d,  $J = 9.1$  Hz, 4 H), 5.90–5.85 (m, 1 H), 5.27–5.22 (m, 2 H), 4.58–4.55 (m, 1 H), 3.73 (s, 6 H), 3.67–3.63 (m, 1 H), 3.58–3.54 (m, 1 H), 2.30–2.26 (m, 1 H), 2.08–2.04 (m, 1 H), 2.01–1.95 (m, 1 H), 1.87–1.82 (m, 1 H);  $^{13}\text{C}$  NMR (175 MHz,  $\text{CD}_3\text{OD}$ )  $\delta$  159.4, 153.8, 137.6, 130.7, 125.9, 118.4, 115.6, 63.5, 56.0, 51.4, 33.7, 25.0; IR (film) 3204, 1629  $\text{cm}^{-1}$ . MS (ESI) 352.2020 (352.2020 calcd for  $\text{C}_{21}\text{H}_{26}\text{N}_3\text{O}_2$ ,  $\text{M}^+$ ).

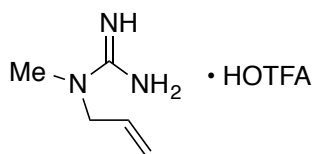

**1-Allyl-1-methylguanidinium trifluoroacetate (28).** A round-bottom flask equipped with a stirbar was charged with **3** (196 mg, 0.63 mmol) and dichloromethane (2.4 mL). Trifluoroacetic acid (0.9 mL) was added to the flask and the reaction mixture was stirred overnight at rt, and the solution was then concentrated *in vacuo*. Toluene (4 mL) was added and the resulting solution was concentrated *in vacuo*. The addition of toluene and subsequent concentration was repeated (3x) to remove all excess trifluoroacetic acid, at which time the compound was obtained as a crystalline white solid: mp = 159–164 °C. This procedure afforded 85 mg (60%) of the title compound. This material also contained ca. 10% of an unidentified side product.  $^1\text{H}$  NMR (500 MHz,  $\text{CD}_3\text{OD}$ )  $\delta$  5.83–5.75 (m, 1 H), 5.26–5.17 (m, 2 H), 3.95 (d, 2 H), 2.99 (s, 3 H);  $^{13}\text{C}$  NMR (125 MHz,  $\text{CD}_3\text{OD}$ )  $\delta$  159.4, 132.8, 118.9, 45.4, 37.3; IR (film) 3312, 3150, 1663  $\text{cm}^{-1}$ . MS (ESI) 114.1028 (114.1026 calcd for  $\text{C}_5\text{H}_{11}\text{N}_3$ ,  $\text{M}^+$ ).

## Preparation and Characterization of Cyclic Guanidine Products

**General Procedure for the Pd-Catalyzed Synthesis of Cyclic Guanidines.** A flame-dried Schlenk tube was cooled under vacuum and charged with the appropriate guanidine substrate (1.0 equiv), Pd<sub>2</sub>(dba)<sub>3</sub> (0.02 equiv), Nixantphos (0.08 equiv), and NaOtBu (2.4 equiv). The flask was evacuated and backfilled with N<sub>2</sub>. Toluene (0.1 M) was added via syringe and the resulting mixture was stirred at rt for 2 min. The appropriate aryl or alkenyl bromide (1.5 equiv) was added and the tube was heated to 107 °C and stirred overnight (~16 h). The mixture was cooled to room temperature and 1 M HCl (10 mL/mmol substrate) and dichloromethane (25 mL/mmol substrate) were added. The layers were separated and the aqueous layer was extracted with dichloromethane (10 mL/mmol). The organic layers were combined and concentrated *in vacuo*. The crude material was purified by flash chromatography on silica gel.

**General Procedure for the Asymmetric Pd-Catalyzed Synthesis of Enantioenriched Cyclic Guanidines.** A flame-dried Schlenk tube was cooled under vacuum and charged with the guanidine substrate **9** (1.0 equiv), Pd<sub>2</sub>(dba)<sub>3</sub> (0.02 equiv), the appropriate ligand (0.08 equiv for monodentate ligands, and 0.16 equiv for bidentate ligands), and NaOtBu (2.4 equiv). The flask was evacuated and backfilled with N<sub>2</sub>. Toluene (0.1 M) was added via syringe and the resulting mixture was stirred at rt for 2 min. 4-bromotoluene (1.5 equiv) was added and the tube was heated to 107 °C and stirred overnight (~16 h). The mixture was cooled to room temperature and 1 M HCl (10 mL/mmol substrate) and dichloromethane (25 mL/mmol substrate) were added. The layers were separated and the aqueous layer was extracted with dichloromethane (10 mL/mmol). The organic layers were combined and concentrated *in vacuo*. The crude material was purified by flash chromatography on silica gel.

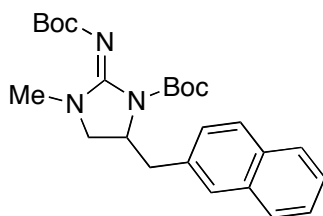

**tert-Butyl-2-[(tert-butoxycarbonyl)imino]-3-methyl-5-(naphthalen-2-ylmethyl)imidazolidine-1-carboxylate (5).** The general procedure was employed for the coupling of **3** (94 mg, 0.3 mmol) and 2-bromonaphthalene (93 mg, 0.45 mmol) using a catalyst composed of Pd<sub>2</sub>dba<sub>3</sub> (5.5 mg, 0.006 mmol) and Nixantphos (13 mg, 0.024 mmol). Saturated aqueous NH<sub>4</sub>Cl was used during the workup instead of 1 M HCl. This procedure afforded 43 mg

(33%) of the title compound as an off-white solid: mp = 56–58 °C. This compound was found to exist as a mixture of rotamers as judged by  $^1\text{H}$  and  $^{13}\text{C}$  NMR analysis; data are for the mixture.  $^1\text{H}$  NMR (700 MHz,  $\text{CDCl}_3$ )  $\delta$  7.81–7.79 (m, 3 H), 7.70 (s, 1 H), 7.48–7.43 (m, 2 H), 7.36 (dd,  $J$  = 1.4, 8.4 Hz, 1 H), 4.47–4.44 (m, 1 H), 3.44–3.40 (m, 1 H), 3.35 (dd,  $J$  = 4.9, 14.0 Hz, 1 H), 3.07 (dd,  $J$  = 2.1, 9.8 Hz, 1 H), 2.93 (dd,  $J$  = 9.1, 14.0 Hz, 1 H), 2.83 (s, 3 H), 1.54 (s, 9 H), 1.45 (s, 9 H);  $^{13}\text{C}$  NMR (175 MHz,  $\text{CDCl}_3$ )  $\delta$  159.6, 151.5, 149.8, 133.9, 133.5, 132.4, 128.4, 128.2, 127.6, 127.6, 127.5, 126.2, 125.8, 82.5, 78.7, 56.7, 49.9, 40.2, 32.1, 28.3, 28.1; IR (film) 1748, 1629  $\text{cm}^{-1}$ . MS (ESI) 440.2538 (440.2544 calcd for  $\text{C}_{25}\text{H}_{33}\text{N}_3\text{O}_4$ ,  $\text{M} + \text{H}^+$ ).

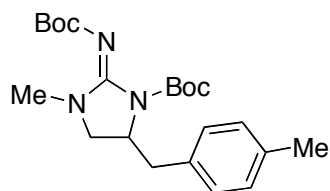

**tert-Butyl 2-[(tert-butoxycarbonyl)imino]-3-methyl-5-(4-methylbenzyl)imidazolidine-1-carboxylate (6).** The general procedure was employed for the coupling of **3** (63 mg, 0.2 mmol) and 4-bromotoluene (51 mg, 0.3 mmol) using a catalyst composed of  $\text{Pd}_2\text{dba}_3$  (3.7 mg, 0.004 mmol) and Nixantphos (8.8 mg, 0.016 mmol). Saturated aqueous  $\text{NH}_4\text{Cl}$  was used during the workup instead of 1 M HCl. This procedure afforded 21 mg (26%) of the title compound as a pale yellow oil. This compound was found to exist as a mixture of rotamers as judged by  $^1\text{H}$  and  $^{13}\text{C}$  NMR analysis; data are for the mixture.  $^1\text{H}$  NMR (700 MHz,  $\text{CDCl}_3$ )  $\delta$  7.12 (d,  $J$  = 7.7 Hz, 2 H), 7.09 (d,  $J$  = 7.7 Hz, 2 H), 4.29–4.26 (m, 1 H), 3.25–3.21 (m, 2 H), 3.04 (dd,  $J$  = 2.8, 9.1 Hz, 1 H), 2.76 (s, 3 H), 2.65 (dd,  $J$  = 9.8, 13.3 Hz, 1 H), 2.32 (s, 3 H), 1.57 (s, 9 H), 1.45 (s, 9 H);  $^{13}\text{C}$  NMR (175 MHz,  $\text{CDCl}_3$ )  $\delta$  165.5, 154.1, 150.6, 136.5, 133.3, 129.4, 129.2, 82.3, 53.2, 47.7, 39.0, 30.5, 28.2, 21.0; IR (film) 1750, 1627  $\text{cm}^{-1}$ . MS (ESI) 404.2545 (404.2544 calcd for  $\text{C}_{22}\text{H}_{33}\text{N}_3\text{O}_4$ ,  $\text{M} + \text{H}^+$ ).

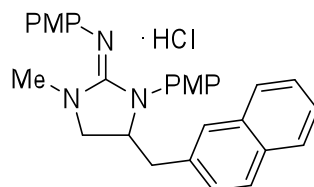

**N,3-Bis(4-methoxyphenyl)-1-methyl-4-(naphthalen-2-ylmethyl)imidazolidin-2-imine hydrochloride (7):** The general procedure was employed for the coupling of **4** (54 mg, 0.15



mmol) and 2-bromonaphthalene (47 mg, 0.23 mmol) using a catalyst composed of Pd<sub>2</sub>dba<sub>3</sub> (2.7 mg, 0.003 mmol), and Nixantphos (6.6 mg, 0.012 mmol). This procedure afforded 42 mg (57%) of the title compound as a pale yellow-brown foam solid: mp = 67–68 °C. <sup>1</sup>H NMR (500 MHz, CDCl<sub>3</sub>) δ 7.80–7.77 (m, 3 H), 7.60 (s, 1 H), 7.50–7.46 (m, 2 H), 7.21 (d, *J* = 8.0 Hz, 1 H), 7.04–7.02 (m, 2 H), 6.97–6.94 (m, 2 H), 6.63–6.60 (m, 2 H), 6.52–6.49 (m, 2 H), 4.50–4.44 (m, 1 H), 3.83–3.79 (m, 1 H), 3.70–3.68 (m, 3 H), 3.39–3.36 (m, 3 H), 3.61–3.59 (m, 1 H), 3.39–3.62 (m, 3 H), 3.23–3.19 (m, 1 H), 3.04 (dd, *J* = 10.0, 13.0 Hz, 1 H); <sup>13</sup>C NMR (125 MHz, CDCl<sub>3</sub>) δ 159.2, 157.7, 156.5, 133.4, 132.5, 132.4, 132.4, 132.3, 129.5, 128.8, 128.0, 127.7, 127.5, 126.9, 126.6, 126.6, 126.1, 114.6, 113.8, 63.8, 55.5, 55.4, 54.0, 39.5, 35.7; IR (film) 3050, 1632 cm<sup>-1</sup>. MS (ESI) 452.2328 (452.2333 calcd for C<sub>29</sub>H<sub>30</sub>N<sub>3</sub>O<sub>2</sub>, M<sup>+</sup>).

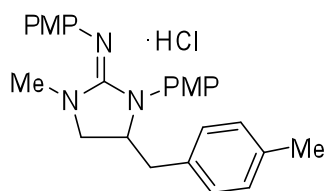

**N,3-Bis(4-methoxyphenyl)-1-methyl-4-(4-methylbenzyl)imidazolidin-2-imine hydrochloride**

**(8):** The general procedure was employed for the coupling of **4** (54 mg, 0.15 mmol) and 4-iodotoluene (49 mg, 0.23 mmol) using a catalyst composed of Pd<sub>2</sub>dba<sub>3</sub> (2.7 mg, 0.003 mmol), and Nixantphos (6.6 mg, 0.012 mmol). This procedure afforded 42 mg (62%) of the title compound as a pale yellow-brown foam solid: mp = 73–75 °C. <sup>1</sup>H NMR (500 MHz, CDCl<sub>3</sub>) δ 7.14 (d, *J* = 8.5 Hz, 2 H), 7.11–7.06 (m, 4 H), 7.02 (d, *J* = 8.0 Hz, 2 H), 6.67 (d, *J* = 9.0 Hz, 2 H), 6.56 (d, *J* = 9.0 Hz, 2 H), 4.49–4.42 (m, 1 H), 3.90–3.86 (m, 1 H), 3.72 (s, 3 H), 3.66 (s, 3 H), 3.60 (dd, *J* = 7.5, 10.0 Hz, 1 H), 3.23 (s, 3 H), 2.96 (dd, *J* = 4.5, 13.5 Hz, 1 H), 2.91 (dd, *J* = 10.0, 13.5 Hz, 1 H), 2.30 (s, 3 H); <sup>13</sup>C NMR (125 MHz, CDCl<sub>3</sub>) δ 159.4, 158.2, 156.1, 137.0, 131.8, 129.6, 129.2, 129.0, 128.7, 127.7, 126.9, 114.8, 113.9, 63.6, 55.6, 55.5, 54.2, 38.4, 36.2, 21.0; IR (film) 3133, 1631 cm<sup>-1</sup>. MS (ESI) 416.2340 (416.2333 calcd for C<sub>26</sub>H<sub>30</sub>N<sub>3</sub>O<sub>2</sub>, M<sup>+</sup>).

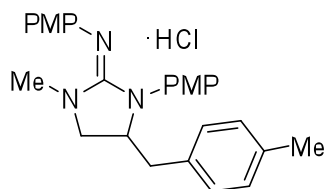

***N*,3-Bis(4-methoxyphenyl)-1-methyl-4-(4-methylbenzyl)imidazolidin-2-imine hydrochloride (8)**: The general procedure was employed for the coupling of **4** (54 mg, 0.15 mmol) and 4-bromotoluene (39 mg, 0.225 mmol) using a catalyst composed of Pd<sub>2</sub>dba<sub>3</sub> (2.7 mg, 0.003 mmol), and Nixantphos (6.6 mg, 0.012 mmol). This procedure afforded 50 mg (73%) of the title compound as a pale yellow-brown foam solid. Spectroscopic data were identical to those provided above.

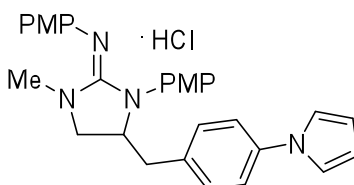

**4-[4-(1*H*-Pyrrol-1-yl)benzyl]-*N*,3-bis(4-methoxyphenyl)-1-methylimidazolidin-2-imine hydrochloride (12)**: The general procedure was employed for the coupling of **4** (54 mg, 0.15 mmol) and 1-(4-iodophenyl)pyrrole (61 mg, 0.23 mmol) using a catalyst composed of Pd<sub>2</sub>dba<sub>3</sub> (2.7 mg, 0.003 mmol), and Nixantphos (6.6 mg, 0.012 mmol). This procedure afforded 48 mg (63%) of the title compound as a pale yellow-brown foam solid: mp = 70–71 °C. <sup>1</sup>H NMR (500 MHz, CDCl<sub>3</sub>) δ 7.30 (d, *J* = 8.0 Hz, 2 H), 7.21–7.17 (m, 4 H), 7.14 (d, *J* = 8.5 Hz, 2 H), 7.04 (t, *J* = 2.5 Hz, 2 H), 6.69 (d, *J* = 9.0 Hz, 2 H), 6.58 (d, *J* = 9.0 Hz, 2 H), 6.33 (t, *J* = 3.0 Hz, 2 H), 4.58–4.51 (m, 1 H), 3.95–3.91 (m, 1 H), 3.72 (s, 3 H), 3.70–3.68 (m, 1 H), 3.67 (s, 3 H), 3.22 (s, 3 H), 3.06–3.04 (m, 2 H); <sup>13</sup>C NMR (125 MHz, CDCl<sub>3</sub>) δ 159.4, 158.2, 156.2, 139.8, 132.4, 130.3, 129.3, 128.6, 127.7, 127.0, 120.7, 119.2, 114.8, 113.9, 110.6, 63.5, 55.6, 55.5, 54.3, 38.2, 36.0; IR (film) 3058, 1635 cm<sup>-1</sup>. MS (ESI) 467.2450 (467.2442 calcd for C<sub>29</sub>H<sub>31</sub>N<sub>4</sub>O<sub>2</sub>, M<sup>+</sup>).

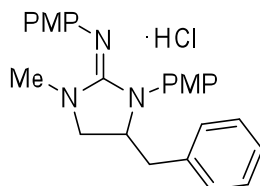

**4-Benzyl-*N*,3-bis(4-methoxyphenyl)-1-methylimidazolidin-2-imine hydrochloride (13)**: The general procedure was employed for the coupling of **4** (54 mg, 0.15 mmol) and bromobenzene (24 μL, 0.23 mmol) using a catalyst composed of Pd<sub>2</sub>dba<sub>3</sub> (2.7 mg, 0.003 mmol), and Nixantphos (6.6 mg, 0.012 mmol). This procedure afforded 48 mg (73%) of the title compound as a pale yellow-brown foam solid: mp = 58–59 °C. <sup>1</sup>H NMR (500 MHz, CDCl<sub>3</sub>) δ 7.31 (t, *J* = 7.0

Hz, 2 H), 7.27–7.26 (m, 1 H), 7.13 (d,  $J = 8.0$  Hz, 2 H), 6.98 (d,  $J = 9.0$  Hz, 2 H), 6.92 (d,  $J = 9.0$  Hz, 2 H), 6.61 (d,  $J = 8.5$  Hz, 2 H), 6.50 (d,  $J = 9.0$  Hz, 2 H), 4.34–4.27 (m, 1 H), 3.83–3.78 (m, 1 H), 3.69 (s, 3 H), 3.65 (s, 3 H), 3.51 (dd,  $J = 3.5, 13.5$  Hz, 1 H), 3.40 (s, 3 H), 3.06 (dd,  $J = 3.5, 13.5$  Hz, 1 H), 2.85 (dd,  $J = 10.0, 14.0$  Hz, 1 H);  $^{13}\text{C}$  NMR (125 MHz,  $\text{CDCl}_3$ )  $\delta$  159.0, 157.5, 156.5, 135.0, 129.9, 129.1, 129.0, 128.6, 128.3, 127.5, 126.5, 114.5, 113.8, 63.9, 55.5, 55.5, 53.8, 39.5, 35.4; IR (film) 3003, 1640  $\text{cm}^{-1}$ . MS (ESI) 402.2177 (402.2176 calcd for  $\text{C}_{25}\text{H}_{28}\text{N}_3\text{O}_2$ ,  $\text{M}^+$ ).

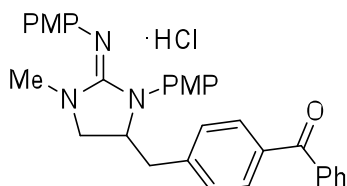

**[4-{3-(4-Methoxyphenyl)-2-[(4-methoxyphenyl)imino]-1-methylimidazolidin-4-ylmethyl}phenyl](phenyl)methanone hydrochloride (14):** The general procedure was employed for the coupling of **4** (54 mg, 0.15 mmol) and 4-iodobenzophenone (69 mg, 0.23 mmol) using a catalyst composed of  $\text{Pd}_2\text{dba}_3$  (2.7 mg, 0.003 mmol), and Nixantphos (6.6 mg, 0.012 mmol). This procedure afforded 56 mg (69%) of the title compound as a pale yellow-brown foam solid: mp = 70–71 °C.  $^1\text{H}$  NMR (500 MHz,  $\text{CDCl}_3$ )  $\delta$  8.75 (s, 1 H), 7.73 (d,  $J = 8.0$  Hz, 2 H), 7.67 (d,  $J = 7.0$  Hz, 2 H), 7.59 (t,  $J = 8.0$  Hz, 1 H), 7.48 (t,  $J = 7.5$  Hz, 2 H), 7.30 (d,  $J = 8.5$  Hz, 2 H), 7.20 (d, 7.5 Hz, 2 H), 7.15 (d,  $J = 8.0$  Hz, 2 H), 6.67 (d,  $J = 7.5$  Hz, 2 H), 6.57 (d,  $J = 7.5$  Hz, 2 H), 4.72–4.65 (m, 1 H), 4.02–3.98 (m, 1 H), 3.76–3.73 (m, 1 H), 3.70 (s, 3 H), 3.65 (s, 3 H), 3.23 (s, 3 H), 3.21–3.17 (m, 1 H), 3.10 (dd,  $J = 4.5, 13.5$  Hz, 1 H);  $^{13}\text{C}$  NMR (125 MHz,  $\text{CDCl}_3$ )  $\delta$  196.2, 159.5, 158.3, 156.1, 140.2, 137.3, 136.3, 132.6, 130.5, 129.9, 129.5, 129.2, 128.3, 128.2, 128.0, 126.6, 114.8, 113.9, 63.1, 55.6, 55.5, 54.4, 38.8, 36.1; IR (film) 3135, 1655, 1630  $\text{cm}^{-1}$ . MS (ESI) 506.2437 (506.2438 calcd for  $\text{C}_{32}\text{H}_{32}\text{N}_3\text{O}_3$ ,  $\text{M}^+$ ).

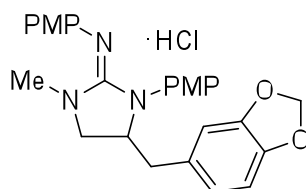

**4-(Benzo[d][1,3]dioxol-5-ylmethyl)-N,3-bis(4-methoxyphenyl)-1-methylimidazolidin-2-imine hydrochloride (15):** The general procedure was employed for the coupling of **4** (54 mg,

0.15 mmol) and 4-bromo-1,2-(methylenedioxy)benzene (27  $\mu\text{L}$ , 0.23 mmol) using a catalyst composed of  $\text{Pd}_2\text{dba}_3$  (2.7 mg, 0.003 mmol), and Nixantphos (6.6 mg, 0.012 mmol). This procedure afforded 59 mg (81%) of the title compound as a pale yellow-brown foam solid: mp = 66–68  $^\circ\text{C}$ .  $^1\text{H}$  NMR (700 MHz,  $\text{CDCl}_3$ )  $\delta$  7.01 (d,  $J$  = 9.1 Hz, 2 H), 6.92 (d,  $J$  = 9.1 Hz, 2 H), 6.73 (d,  $J$  = 7.7 Hz, 1 H), 6.61–6.58 (m, 4 H), 6.51 (d,  $J$  = 9.1 Hz, 2 H), 5.93 (s, 2 H), 4.31–4.26 (m, 1 H), 3.84–3.81 (m, 1 H), 3.70 (s, 3 H), 3.65 (s, 3 H), 3.53 (dd,  $J$  = 7.0, 9.8 Hz, 1 H), 3.39 (s, 3 H), 2.95 (dd,  $J$  = 4.2, 13.3 Hz, 1 H), 3.78 (dd,  $J$  = 9.8, 14.0 Hz, 1 H);  $^{13}\text{C}$  NMR (175 MHz,  $\text{CDCl}_3$ )  $\delta$  159.1, 157.7, 156.4, 148.1, 146.8, 129.6, 128.7, 128.4, 127.8, 126.8, 122.2, 114.5, 113.7, 109.2, 108.6, 101.1, 63.9, 55.5, 55.4, 53.8, 38.9, 35.6; IR (film) 3005, 1640  $\text{cm}^{-1}$ . MS (ESI) 446.2077 (446.2074 calcd for  $\text{C}_{26}\text{H}_{28}\text{N}_3\text{O}_4$ ,  $\text{M}^+$ ).

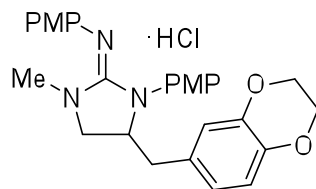

**4-[(2,3-Dihydrobenzo[b][1,4]dioxin-6-yl)methyl]-N,3-bis(4-methoxyphenyl)-1-**

**methylimidazolidin-2-imine hydrochloride (16):** The general procedure was employed for the coupling of **4** (54 mg, 0.15 mmol) and 6-bromo-1,4-benzodioxane (30  $\mu\text{L}$ , 0.225 mmol) using a catalyst composed of  $\text{Pd}_2\text{dba}_3$  (2.7 mg, 0.003 mmol), and Nixantphos (6.6 mg, 0.012 mmol). This procedure afforded 67 mg (90%) of the title compound as a pale yellow-brown foam solid: mp = 76–77  $^\circ\text{C}$ .  $^1\text{H}$  NMR (500 MHz,  $\text{CDCl}_3$ )  $\delta$  6.95 (d,  $J$  = 9.0 Hz, 2 H), 6.88 (d,  $J$  = 9.0 Hz, 2 H), 6.78 (d,  $J$  = 8.0 Hz, 1 H), 6.61–6.57 (m, 4 H), 6.49 (d,  $J$  = 8.5 Hz, 2 H), 4.29–4.24 (m, 1 H), 4.23 (s, 4 H), 3.84–3.80 (m, 1 H), 3.69 (s, 3 H), 3.64 (s, 3 H), 3.49 (dd,  $J$  = 7.0, 10.5 Hz, 1 H), 3.39 (s, 3 H), 2.92 (dd,  $J$  = 4.5, 13.5 Hz, 1 H), 2.72 (dd,  $J$  = 9.5, 14.0 Hz, 1 H);  $^{13}\text{C}$  NMR (125 MHz,  $\text{CDCl}_3$ )  $\delta$  159.0, 157.5, 156.4, 143.7, 142.9, 129.9, 128.5, 128.3, 127.9, 126.5, 122.0, 117.7, 117.7, 114.5, 113.7, 64.4, 64.3, 63.9, 55.5, 55.4, 53.7, 38.5, 35.3; IR (film) 3000, 1639  $\text{cm}^{-1}$ . MS (ESI) 460.2226 (460.2231 calcd for  $\text{C}_{27}\text{H}_{30}\text{N}_3\text{O}_4$ ,  $\text{M}^+$ ).

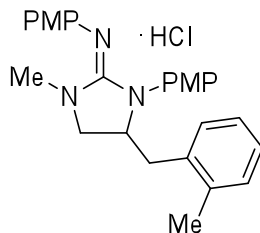

***N*,3-Bis(4-methoxyphenyl)-1-methyl-4-(2-methylbenzyl)imidazolidin-2-imine hydrochloride**

**(17):** The general procedure was employed for the coupling of **4** (54 mg, 0.15 mmol) and 2-bromotoluene (27  $\mu$ L, 0.23 mmol) using a catalyst composed of Pd<sub>2</sub>dba<sub>3</sub> (2.7 mg, 0.003 mmol), and Nixantphos (6.6 mg, 0.012 mmol). This procedure afforded 52 mg (76%) of the title compound as a pale yellow-brown foam solid. The material contained ca. 8% of an unsaturated cyclic guanidine resulting from oxidation of the title compound (tentatively assigned as the 2-aminoimidazole derivative (*E*)-*N*,3-bis(4-methoxyphenyl)-1-methyl-4-(2-methylbenzyl)-1,3-dihydro-2*H*-imidazol-2-imine hydrochloride). mp = 78–79 °C. <sup>1</sup>H NMR (700 MHz, CDCl<sub>3</sub>)  $\delta$  7.15–7.11 (m, 3 H), 7.08–7.07 (m, 1 H), 7.00 (d, *J* = 9.1 Hz, 2 H), 6.90 (d, *J* = 8.4 Hz, 2 H), 6.60 (d, *J* = 9.1 Hz, 2 H), 6.49 (d, *J* = 9.1 Hz, 2 H), 4.33–4.29 (m, 1 H), 3.81–3.78 (m, 1 H), 3.69 (s, 3 H), 3.64 (s, 3 H), 3.54 (dd, *J* = 7.7, 10.5 Hz, 1 H), 3.42 (s, 3 H), 3.06 (dd, *J* = 4.2, 14.0 Hz, 1 H), 2.81 (dd, *J* = 10.5, 14.0 Hz, 1 H), 2.10 (s, 3 H); <sup>13</sup>C NMR (175 MHz, CDCl<sub>3</sub>)  $\delta$  159.0, 157.5, 156.4, 136.3, 133.4, 130.8, 129.6, 129.6, 128.6, 128.2, 127.5, 126.6, 126.4, 114.5, 113.7, 62.6, 55.5, 55.4, 54.1, 36.8, 35.5, 19.3; IR (film) 3002, 1630 cm<sup>-1</sup>. MS (ESI) 416.2328 (416.2333 calcd for C<sub>26</sub>H<sub>30</sub>N<sub>3</sub>O<sub>2</sub>, M<sup>+</sup>).

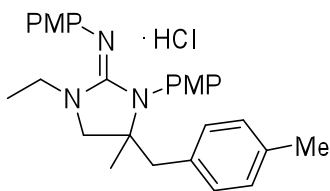

**1-Ethyl-*N*,3-bis(4-methoxyphenyl)-4-methyl-4-(4-methylbenzyl)imidazolidin-2-imine**

**hydrochloride (18):** The general procedure was employed for the coupling of **9** (59 mg, 0.15 mmol) and 4-bromotoluene (35 mg, 0.23 mmol) using a catalyst composed of Pd<sub>2</sub>dba<sub>3</sub> (2.7 mg, 0.003 mmol), and Nixantphos (6.6 mg, 0.012 mmol). This procedure afforded 71 mg (99%) of the title compound as a pale yellow-brown foam solid: mp = 61–62 °C. <sup>1</sup>H NMR (500 MHz, CDCl<sub>3</sub>)  $\delta$  7.18 (d, *J* = 8.0 Hz, 2 H), 7.11 (d, *J* = 8.0 Hz, 2 H), 6.90–6.87 (m, 4 H), 6.61 (d, *J* = 8.5 Hz, 2 H), 6.50 (d, *J* = 8.5 Hz, 2 H), 4.02–3.95 (m, 1 H), 3.87–3.80 (m, 2 H), 3.70 (s, 3 H), 3.65

(s, 3 H), 3.35 (d,  $J = 10.5$  Hz, 1 H), 2.98 (d,  $J = 13.5$  Hz, 1 H), 2.75 (d,  $J = 13.5$  Hz, 1 H), 2.36 (s, 3 H), 1.26–1.20 (m, 6 H);  $^{13}\text{C}$  NMR (125 MHz,  $\text{CDCl}_3$ )  $\delta$  159.2, 157.3, 155.2, 137.6, 131.5, 130.2, 130.0, 129.5, 128.7, 127.0, 126.2, 114.3, 113.7, 65.7, 55.9, 55.5, 55.5, 45.1, 42.0, 25.3, 21.1, 12.3; IR (film) 2971, 1630  $\text{cm}^{-1}$ . MS (ESI) 444.2645 (444.2646 calcd for  $\text{C}_{28}\text{H}_{34}\text{N}_3\text{O}_2$ ,  $\text{M}^+$ ).

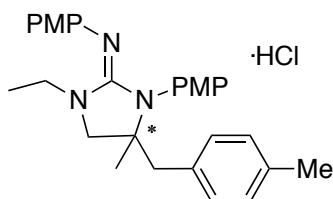

**(+)-1-Ethyl-*N*,3-bis(4-methoxyphenyl)-4-methyl-4-(4-methylbenzyl)imidazolidin-2-imine hydrochloride (18; prepared using (S)-Phanephos as ligand):** The general procedure for the asymmetric synthesis of cyclic guanidine products was employed for the coupling of **9** (58.5 mg, 0.15 mmol) and 4-bromotoluene (39 mg, 0.225 mmol) using a catalyst composed of  $\text{Pd}_2\text{dba}_3$  (2.7 mg, 0.003 mmol), and (S)-Phanephos (6.9 mg, 0.012 mmol) except the reaction was run for 36 hrs in order to ensure complete conversion. This procedure afforded 65.0 mg (84%) of the title compound as a pale yellow-brown foam solid:  $[\alpha]_D^{23} +18.0$  ( $c$  1.3,  $\text{CH}_2\text{Cl}_2$ ). Spectroscopic data were identical to those provided above. The enantiomeric purity was determined to be 61:39 er as assessed by converting this compound to the corresponding Mosher amide (see below for details).

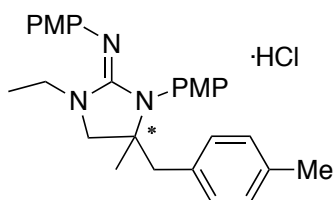

**(-)-1-Ethyl-*N*,3-bis(4-methoxyphenyl)-4-methyl-4-(4-methylbenzyl)imidazolidin-2-imine hydrochloride (18; prepared using (S)-BINAP as ligand):** The general procedure for the asymmetric synthesis of cyclic guanidine products was employed for the coupling of **9** (39 mg, 0.1 mmol) and 4-bromotoluene (26 mg, 0.15 mmol) using a catalyst composed of  $\text{Pd}_2\text{dba}_3$  (1.8 mg, 0.002 mmol), and (S)-BINAP (5.0 mg, 0.008 mmol). This procedure afforded 48 mg (99%) of the title compound as a pale yellow-brown foam solid:  $[\alpha]_D^{23} -5.9$  ( $c$  0.9,  $\text{CH}_2\text{Cl}_2$ ). Spectroscopic data were identical to those provided above. The enantiomeric purity was determined to be 48:52 er as assessed by converting this compound to the corresponding Mosher amide (see below for details).

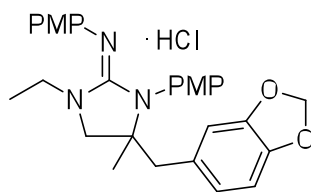

**4-(Benzo[d][1,3]dioxol-5-ylmethyl)-1-ethyl-N,3-bis(4-methoxyphenyl)-4-**

**methylimidazolidin-2-imine hydrochloride (19):** The general procedure was employed for the coupling of **9** (59 mg, 0.15 mmol) and 4-bromo-1,2-(methylenedioxy)benzene (27  $\mu$ L, 0.225 mmol), using a catalyst composed of Pd<sub>2</sub>dba<sub>3</sub> (2.7 mg, 0.003 mmol), and Nixantphos (6.6 mg, 0.012 mmol). This procedure afforded 76 mg (99%) of the title compound as a pale yellow-brown foam solid: mp = 66–67 °C. <sup>1</sup>H NMR (500 MHz, CDCl<sub>3</sub>)  $\delta$  6.93–6.83 (m, 4 H), 6.81 (d, *J* = 8.0 Hz, 1 H), 6.71–6.68 (m, 2 H), 6.62 (s, br, 2 H), 6.51 (d, *J* = 8.5 Hz, 2 H), 5.98 (s, 2 H), 4.01–3.94 (m, 1 H), 3.88 (d, *J* = 10.0 Hz, 1 H), 3.84–3.77 (m, 1 H), 3.71 (s, 3 H), 3.66 (s, 3 H), 3.42 (d, *J* = 10.5 Hz, 1 H), 2.96 (d, *J* = 13.5 Hz, 1 H), 2.69 (d, *J* = 13.5 Hz, 1 H), 1.26–1.19 (m, 6 H); <sup>13</sup>C NMR (125 MHz, CDCl<sub>3</sub>)  $\delta$  159.3, 157.6, 155.3, 148.0, 147.2, 129.8, 128.1, 128.0, 126.7, 126.7, 123.6, 114.4, 113.7, 110.4, 108.5, 101.3, 65.8, 55.9, 55.5, 55.5, 45.0, 42.1, 25.3, 12.3; IR (film) 2972, 1627 cm<sup>-1</sup>. MS (ESI) 474.2379 (474.2387 calcd for C<sub>28</sub>H<sub>32</sub>N<sub>3</sub>O<sub>4</sub>, M<sup>+</sup>).

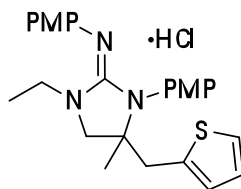

**1-Ethyl-N,3-bis(4-methoxyphenyl)-4-methyl-4-(thiophen-2-ylmethyl)imidazolidin-2-imine**

**hydrochloride (20):** The general procedure was employed for the coupling of **9** (59 mg, 0.15 mmol) and 2-bromothiophene (22  $\mu$ L, 0.225 mmol), using a catalyst composed of Pd<sub>2</sub>dba<sub>3</sub> (2.7 mg, 0.003 mmol), and Nixantphos (6.6 mg, 0.012 mmol). This procedure afforded 70 mg (99%) of the title compound as a pale yellow-brown foam solid: mp = 63–65 °C. <sup>1</sup>H NMR (500 MHz, CDCl<sub>3</sub>)  $\delta$  7.31–7.30 (m, 1 H), 7.06–6.97 (m, 6 H), 6.62 (d, *J* = 8.5 Hz, 2 H), 6.49 (d, *J* = 9.5 Hz, 2 H), 3.98–3.87 (m, 2 H), 3.69–3.60 (m, 8 H), 3.24 (d, *J* = 15.5 Hz, 1 H), 3.05 (d, *J* = 15.0 Hz, 1 H), 1.27 (s, 3 H), 1.10 (t, *J* = 7.5 Hz, 3 H); <sup>13</sup>C NMR (125 MHz, CDCl<sub>3</sub>)  $\delta$  159.3, 157.4, 155.2, 136.3, 130.3, 128.4, 128.1, 127.2, 126.7, 126.4, 125.5, 114.4, 113.7, 65.3, 55.9, 55.5, 55.4, 41.9, 39.9, 26.0, 11.9; IR (film) 3041, 1630 cm<sup>-1</sup>. MS (ESI) 436.2057 (436.2053 calcd for C<sub>25</sub>H<sub>29</sub>N<sub>3</sub>O<sub>2</sub>S, M<sup>+</sup>).

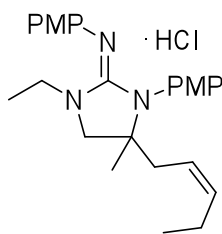

**(Z)-1-Ethyl-N,3-bis(4-methoxyphenyl)-4-methyl-4-(pent-2-en-1-yl)imidazolidin-2-imine hydrochloride (21):** The general procedure (using modified stoichiometries of reactants) was used for the coupling of **9** (59 mg, 0.15 mmol) and 1-bromobutene (300  $\mu$ L, 0.60 mmol, 4.0 equiv, 2 M solution in toluene) using a catalyst composed of Pd<sub>2</sub>dba<sub>3</sub> (2.7 mg, 0.003 mmol), and Nixantphos (6.6 mg, 0.012 mmol) in the presence of NaOtBu (64.9 mg, 0.60 mmol, 4.5 equiv). This procedure afforded 57 mg (86%) of the title compound as a pale yellow-brown oil. <sup>1</sup>H NMR (700 MHz, CDCl<sub>3</sub>)  $\delta$  6.99 (s, br, 1 H), 6.92 (d,  $J$  = 8.4 Hz, 2 H), 6.76 (s, br, 1 H), 6.65–6.53 (m, br, 2 H), 6.49 (d,  $J$  = 9.1 Hz, 2 H), 5.74–5.70 (m, 1 H), 5.39–5.35 (m, 1 H), 4.10–4.05 (m, 1 H), 3.92–3.86 (m, 1 H), 3.71–3.67 (m, 1 H), 3.68 (s, 3 H), 3.64 (s, 3 H), 3.59 (d,  $J$  = 9.8 Hz, 1 H), 2.42 (dd,  $J$  = 6.3, 14.7 Hz, 1 H), 2.28 (dd,  $J$  = 7.7, 15.4 Hz, 1 H), 2.10–2.06 (m, 2 H), 1.34 (t,  $J$  = 7.0 Hz, 3 H), 1.25 (s, 3 H), 1.01 (t,  $J$  = 7.7 Hz, 3 H); <sup>13</sup>C NMR (175 MHz, CDCl<sub>3</sub>)  $\delta$  159.2, 157.3, 155.0, 137.3, 130.5, 129.7, 128.1, 126.3, 120.7, 114.2, 113.7, 65.3, 56.2, 55.4, 55.4, 42.2, 37.1, 25.6, 21.0, 13.9, 12.3; IR (film) 3006, 1627 cm<sup>-1</sup>. MS (ESI) 408.2643 (408.2646 calcd for C<sub>25</sub>H<sub>34</sub>N<sub>3</sub>O<sub>2</sub>, M<sup>+</sup>).

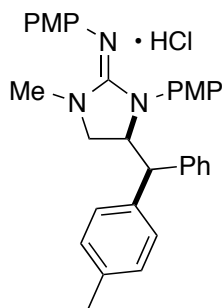

**(±)-(S\*,S\*)-N,3-Bis(4-methoxyphenyl)-1-methyl-4-(phenyl(p-tolyl)methyl)imidazolidin-2-imine hydrochloride (22a).** The general procedure was employed for the coupling of **10** (132 mg, 0.3 mmol) and 4-bromotoluene (76 mg, 0.45 mmol), using a catalyst composed of Pd<sub>2</sub>dba<sub>3</sub> (5.5 mg, 0.006 mmol), and Nixantphos (13.2 mg, 0.024 mmol). This procedure afforded 35 mg (22%) of the title compound as a pale yellow-brown solid: mp = 91–93 °C. This compound was judged to be a single diastereomer (> 20:1 dr) by <sup>1</sup>H NMR analysis. <sup>1</sup>H NMR (700 MHz, CDCl<sub>3</sub>)  $\delta$  11.33 (s, br, 1 H), 7.38–7.36 (m, 2 H), 7.31–7.29 (m, 1 H), 7.25–7.24 (m, 2 H), 7.04 (d,  $J$  = 7.7 Hz, 2 H), 6.99 (d,  $J$  = 8.4 Hz, 2 H), 6.76 (d,  $J$  = 9.1 Hz, 2 H), 6.46 (d,  $J$  = 9.1 Hz, 2 H), 6.40 (s, 4



H), 4.65–4.62 (m, 1 H), 4.35 (d,  $J = 8.4$  Hz, 1 H), 4.15–4.12 (m, 1 H), 3.64 (s, 3 H), 3.63 (s, 3 H), 3.51 (dd,  $J = 4.9, 11.2$  Hz, 1 H), 3.27 (s, 3 H), 2.28 (s, 3 H);  $^{13}\text{C}$  NMR (175 MHz,  $\text{CDCl}_3$ )  $\delta$  158.9, 158.1, 157.7, 139.3, 137.3, 136.6, 132.0, 129.6, 129.2, 128.6, 128.5, 128.2, 128.2, 127.9, 126.3, 114.1, 113.7, 66.7, 55.4, 54.8, 53.3, 35.2, 21.0 (one carbon signal is absent due to incidental equivalence); IR (film) 3105, 1641  $\text{cm}^{-1}$ . MS (ESI) 492.2652 (492.2646 calcd for  $\text{C}_{32}\text{H}_{34}\text{N}_3\text{O}_2$ ,  $\text{M}^+$ ).

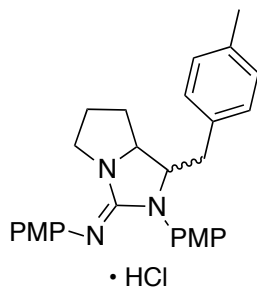

**(±)-N,2-Bis-(4-methoxyphenyl)-1-(4-methylbenzyl)tetrahydro-1H-pyrrolo[1,2-c]imidazole-3(2H)-imine hydrochloride (23).** The general procedure was employed for the coupling of **11** (77.6 mg, 0.2 mmol) and 4-bromotoluene (52 mg, 0.3 mmol), using a catalyst composed of  $\text{Pd}_2\text{dba}_3$  (3.6 mg, 0.004 mmol), and Nixantphos (8.8 mg, 0.016 mmol). This procedure afforded a crude mixture that was determined to be a 1.5:1 mixture of diastereomers by  $^1\text{H}$  NMR analysis. After purification by flash column chromatography 53 mg (60%) of the title compound was obtained as a pale brown solid and as a 2:1 mixture of diastereomers as determined by  $^1\text{H}$  NMR analysis. The data is for the mixture except the  $^1\text{H}$  NMR data, which is only for the major isomer: mp = 58–61 °C.  $^1\text{H}$  NMR (700 MHz,  $\text{CDCl}_3$ )  $\delta$  10.94, (s, br, 1 H), 7.21–7.14 (m, 4 H), 7.12–7.08 (m, 2 H), 6.97 (d,  $J = 8.4$  Hz, 2 H), 6.84–6.80 (m, 2 H), 6.68–6.67 (m, 2 H), 4.50–4.47 (m, 1 H), 3.95–3.92 (m, 1 H), 3.77 (s, 3 H), 3.71 (s, 3 H), 3.45–3.44 (m, 1 H), 3.35–3.32 (m, br, 1 H), 2.98 (dd,  $J = 3.5, 13.3$  Hz, 1 H), 2.53 (dd,  $J = 11.2, 14.0$  Hz, 1 H), 2.31 (s, 3 H), 2.07–2.03 (m, 1 H), 1.87–1.79 (m, 1 H), 1.62–1.58 (m, 2 H);  $^{13}\text{C}$  NMR (175 MHz,  $\text{CDCl}_3$ )  $\delta$  159.6, 159.5, 157.8, 157.7, 137.0, 136.8, 132.4, 131.7, 129.7, 129.5, 129.4, 128.8, 128.4, 128.0, 126.6, 126.0, 125.4, 115.1, 115.1, 114.1, 68.4, 66.2, 64.9, 64.6, 55.5, 55.4, 49.3, 48.7, 38.2, 35.2, 31.2, 26.7, 26.2, 25.8, 21.0, 20.0; IR (film) 1625  $\text{cm}^{-1}$ . MS (ESI) 442.2484 (442.2489 calcd for  $\text{C}_{28}\text{H}_{32}\text{N}_3\text{O}_2$ ,  $\text{M}^+$ ).

## Deprotection of Cyclic Guanidine Product 18

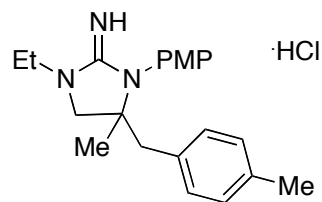

### 1-Ethyl-3-(4-methoxyphenyl)-4-methyl-4-(4-methylbenzyl)imidazolidin-2-imine

**hydrochloride (27).** A Schlenk tube was charged with a stirbar, **18** (48 mg, 0.1 mmol) and CH<sub>3</sub>CN (1 mL). A solution of ceric ammonium nitrate (329 mg, 0.6 mmol) in H<sub>2</sub>O (6 mL) was added to the reaction flask and the mixture was stirred at rt for 5 min. The mixture was then heated at 50 °C for 12 h before being cooled to rt, at which time dichloromethane (15 mL) was added. The mixture was transferred to a separatory funnel and the layers were separated. The organic layer was washed with saturated Na<sub>2</sub>SO<sub>3</sub> (10 mL), saturated aqueous NaHCO<sub>3</sub> (10 mL), and brine (10 mL). The organic layer was dried over anhydrous sodium sulfate, filtered, and concentrated *in vacuo*. The crude material was purified by flash chromatography on silica gel to afford 14.6 mg (39%) of the title compound as white solid: mp = 223–226 °C. <sup>1</sup>H NMR (700 MHz, CDCl<sub>3</sub>) δ 7.19 (s, br 2 H), 7.13 (d, *J* = 7.7 Hz, 2 H), 7.03 (d, *J* = 9.1 Hz, 2 H), 6.98 (d, *J* = 7.7 Hz, 2 H), 3.91–3.88 (m, 1 H), 3.88 (s, 3 H), 3.84–3.81 (m, 1 H), 3.77 (d, *J* = 9.8 Hz, 1 H), 3.18 (d, *J* = 9.8 Hz, 1 H), 2.94 (d, *J* = 13.3 Hz, 1 H), 2.70 (d, *J* = 13.3 Hz, 1 H), 2.33 (s, 3 H), 1.31 (s, 3 H) 1.25 (t, *J* = 7.0 Hz, 3 H); <sup>13</sup>C NMR (175 MHz, CDCl<sub>3</sub>) δ 161.1, 155.9, 137.5, 131.4 (br, 1 C), 131.3, 129.9, 129.6, 123.5, 115.8, 65.8, 55.7, 55.6, 43.7, 41.3, 23.9, 21.0, 12.2; IR (film) 3250, 1658 cm<sup>-1</sup>. MS (ESI) 338.2228 (338.2227 calcd for C<sub>21</sub>H<sub>28</sub>N<sub>3</sub>O, M<sup>+</sup>).

### Structural Assignment of Deprotected Cyclic Guanidine Product 27.

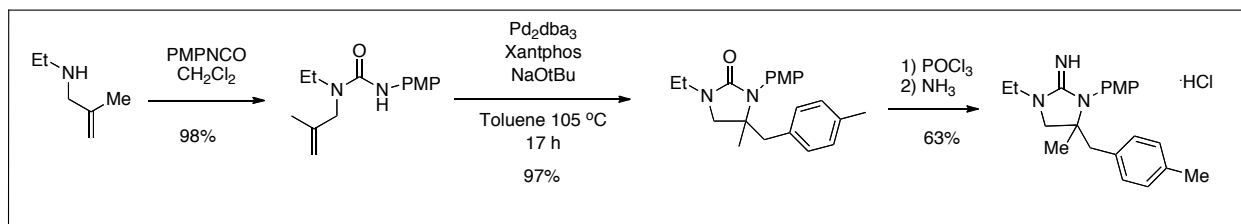

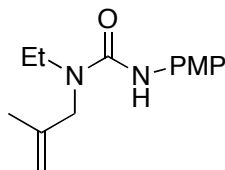

**1-Ethyl-3-(4-methoxyphenyl)-1-(2-methylallyl)urea (S2).** A flame-dried flask equipped with a stirbar was charged with *N*-ethyl-2-methylallylamine (1.3 mL, 10 mmol) and dichloromethane (100 mL). 4-methoxyphenyl isocyanate (1.55 mL, 12 mmol) was added to the flask and the mixture was stirred at rt for 1 h. The crude reaction mixture was concentrated *in vacuo* and purified by flash chromatography on silica gel to afford 2.43 mg (98%) of the title compound as a pale yellow oil. <sup>1</sup>H NMR (500 MHz, CDCl<sub>3</sub>) δ 7.23 (d, *J* = 8.5 Hz, 2 H), 6.82 (d, *J* = 8.5 Hz, 2 H), 6.30, (s, 1 H), 5.02 (s, br, 2 H), 3.83 (s, br, 2 H), 3.77 (s, 3 H), 3.42 (q, *J* = 7.0 Hz, 2 H), 1.79 (s, 3 H), 1.20 (t, *J* = 7.0 Hz, 3 H).

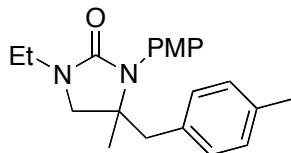

**1-Ethyl-3-(4-methoxyphenyl)-4-methyl-4-(4-methylbenzyl)imidazolidin-2-one (S3):** A flame-dried Schlenk tube was cooled under vacuum and charged with Pd<sub>2</sub>dba<sub>3</sub> (110 mg, 0.12 mmol), xantphos (139 mg, 0.24 mmol), NaOtBu (865 mg, 9.0 mmol), and 4-bromotoluene (1.5 g, 9.0 mmol). A solution of **S2** (1.5 g, 6.0 mmol) in toluene (30 mL) was added via syringe and the tube was heated to 105 °C for 3 h. The mixture was cooled to rt and saturated aqueous NH<sub>4</sub>Cl (15 mL) and ethyl acetate (25 mL) were added. The layers were separated and the organic layer was dried over anhydrous sodium sulfate, filtered, and concentrated *in vacuo*. The crude material was purified by flash chromatography on silica gel to afford 1.96 mg (97%) of the title compound as a orange yellow oil. <sup>1</sup>H NMR (700 MHz, CDCl<sub>3</sub>) δ 7.18 (d, *J* = 9.1 Hz, 2 H), 7.08 (d, *J* = 7.7 Hz, 2 H), 6.99 (d, *J* = 8.4 Hz, 2 H), 6.92 (d, *J* = 9.1 Hz, 2 H), 3.82 (s, 3 H), 3.46 (d, *J* = 8.4 Hz, 1 H), 3.37–3.32 (m, 1 H), 3.27–3.22 (m, 1 H), 2.92 (d, *J* = 13.3 Hz, 1 H), 2.84 (d, *J* = 9.1 Hz, 1 H), 2.65 (d, *J* = 13.3 Hz, 1 H), 2.31 (s, 3 H), 1.22 (s, 3 H), 1.11 (t, *J* = 7.0 Hz, 3 H);

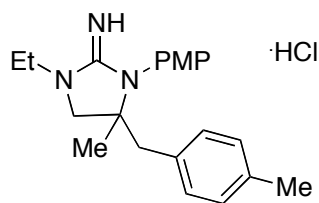

### 1-Ethyl-3-(4-methoxyphenyl)-4-methyl-4-(4-methylbenzyl)imidazolidin-2-imine

**hydrochloride (27).** A flame-dried flask was cooled under a stream of  $N_2$  and charged with **S3** (100 mg, 0.3 mmol) and toluene (2 mL).  $POCl_3$  (0.6 mL) was added and the mixture was stirred at 100 °C until the starting material had been consumed as judged by  $ESI^+$  MS analysis (ca. 2 hr). The reaction mixture was cooled to rt and concentrated *in vacuo*. The crude product was dissolved in acetonitrile (10 mL) and a solution of ammonia in ethanol (15 mL, 2 M in ethanol) was added. The mixture was stirred at rt until the starting material had been consumed as judged by  $ESI^+$  MS analysis (ca. 1 hr). The reaction mixture was concentrated and dissolved in dichloromethane (5 mL). Water (5 mL) was added and the mixture was transferred to a separatory funnel. The layers were separated and the organic layer was washed with 1 M HCl (10 mL) and saturated aqueous sodium chloride (2 x 10 mL). The combined aqueous layers were extracted with dichloromethane (3 x 10 mL). The combined organics layers were dried over anhydrous sodium sulfate, filtered, and concentrated *in vacuo*. The crude material was purified by flash chromatography on silica gel to afford 70 mg (63%) of the title compound as a white solid. The spectroscopic properties of this compound were identical to that of compound **27** described above that was prepared by deprotection of **18**.

### Stereochemical Analysis of Enantioenriched Cyclic Guanidine Product **18**.

In order to assess the enantiomeric purity of cyclic guanidine products **18** prepared from (*S*)-Phanephos and (*S*)-BINAP, the carboamination products were converted to the corresponding Mosher amides **S4** via the two-step procedure illustrated below. The enantiomeric ratio of **18** was assigned based on the diastereomeric ratio of crude **S4** as determined by  $^1H$  NMR analysis.

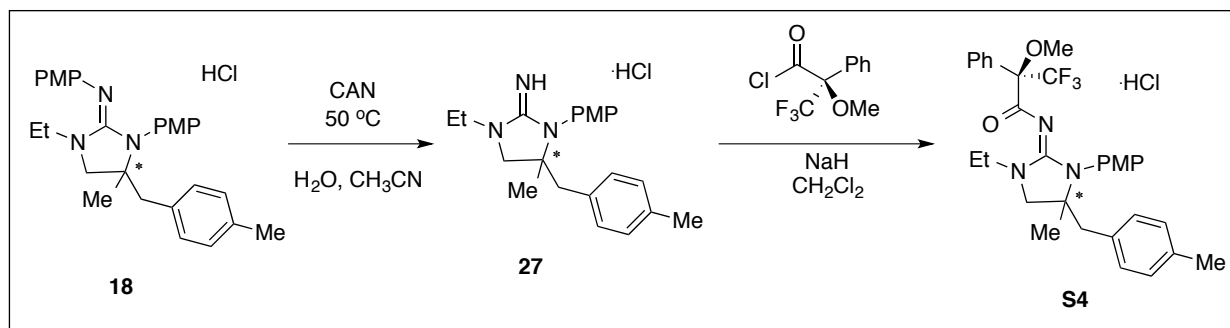

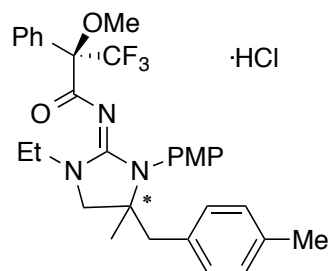

**(2R)-N-(1-Ethyl-3-(4-methoxyphenyl)-4-methyl-4-(4-methylbenzyl)imidazolidin-2-ylidene)-3,3,3-trifluoro-2-methoxy-2-phenylpropanamide hydrochloride (S4 prepared from (+)-18 that was generated using (S)-Phanephos as ligand).** The chiral guanidine (+)-18 prepared using (S)-Phanephos as the ligand (51.5 mg, 0.11 mmol) was deprotected with ceric ammonium nitrate (361 mg, 0.66 mmol) according to the procedure detailed above. After flash chromatography, this procedure afforded 8.0 mg (20%) of enantioenriched **27** as a brown solid. The spectroscopic properties of this compound were identical to that of racemic **27** described above. The purified nonracemic material **27** (8.0 mg, 0.02 mmol) was dissolved in dichloromethane (1 mL) and stirred at rt. NaH (2.5 mg, 0.06 mmol, 60% dispersion in mineral oil) was added and the mixture was allowed to stir at rt for 10 min. Neat (S)-(+)- $\alpha$ -Methoxy- $\alpha$ -trifluoromethylphenylacetyl chloride (6  $\mu$ L, 0.03 mmol) was added via syringe and the mixture was stirred at rt until the starting material had been consumed as judged by ESI<sup>+</sup> MS analysis of an aliquot removed from the reaction mixture (ca. 1 hr). Brine (2 mL) was added and the biphasic mixture was transferred to a separatory funnel. The layers were separated and the aqueous layer was extracted with dichloromethane (2 x 4 mL). The combined organic layers were dried over anhydrous sodium sulfate, filtered, and concentrated *in vacuo*. This procedure afforded a crude mixture that was determined to be a 61:39 mixture of diastereomers by <sup>1</sup>H NMR analysis. The crude material was purified by flash chromatography on silica gel to afford 8.9 mg (77%) of the title compound as a pale brown foamy-oil and as a 57:43 mixture of diastereomers (note that product er was assigned based on dr of the crude product, as some separation of diastereomers likely occurred during purification). Data are for the mixture of isomers. <sup>1</sup>H NMR (500 MHz, CDCl<sub>3</sub>)  $\delta$  7.44–7.40 (m, 3.5 H), 7.29–7.24 (m, 3.75 H), 7.23–7.16 (m, 5 H), 7.12–7.10 (m, 3.5 H), 7.05–7.02 (m, 3.5 H), 6.89–6.87 (m, 3.5 H), 3.83 (s, 5.25 H), 3.77 (d, *J* = 10.0 Hz, 0.75 H), 3.73 (d, *J* = 10.0 Hz, 1 H), 3.35–3.25 (m, 2.75 H), 3.24 (s, 3 H), 3.22 (s, 2.25 H), 3.20–3.18 (m, 0.75 H), 3.16 (d, *J* = 10.0 Hz, 1 H), 3.10 (d, *J* = 10.5 Hz, 0.75 H), 3.07–3.03 (m, 1.75 H), 2.75 (d, *J* = 13.5 Hz, 1 H), 2.69 (d, *J* = 13.5 Hz, 0.75 H), 2.32 (s, 5.25 H), 1.31 (s, 2.25 H), 1.28 (s, 3 H), 1.12–1.08 (m, 5.25 H); <sup>13</sup>C NMR (125 MHz, CDCl<sub>3</sub>)  $\delta$  167.9, 167.8, 164.4, 164.3, 159.7, 159.6, 136.9, 136.9, 135.8, 135.7, 132.2, 132.2, 131.6, 131.6, 130.2,

130.1, 129.3, 129.3, 127.9, 127.6, 127.5, 127.5, 127.4, 125.7, 123.4, 114.1, 64.5, 64.5, 55.5, 55.0, 54.7, 54.3, 44.3, 43.9, 40.2, 40.1, 24.5, 24.4, 21.0, 12.4, 12.3;  $^{19}\text{F}$  NMR (376 MHz,  $\text{CDCl}_3$ )  $\delta$  -69.56, -69.58; IR (film) 2925, 1653, 1559  $\text{cm}^{-1}$ . MS (ESI) 554.2625 (554.2625 calcd for  $\text{C}_{31}\text{H}_{34}\text{F}_3\text{N}_3\text{O}_3$ ,  $\text{M}^+$ ).

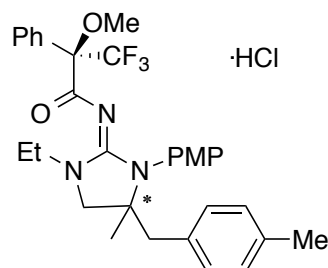

**(2R)-N-(1-Ethyl-3-(4-methoxyphenyl)-4-methyl-4-(4-methylbenzyl)imidazolidin-2-ylidene)-3,3,3-trifluoro-2-methoxy-2-phenylpropanamide hydrochloride (S4 prepared from (-)-18 that was generated using (S)-BINAP as ligand).** The chiral guanidine (-)-18 prepared using (S)-BINAP as the ligand (48 mg, 0.1 mmol) was deprotected with ceric ammonium nitrate (329 mg, 0.6 mmol) according to the procedure detailed above. After flash chromatography, this procedure afforded 14.4 mg (39%) of enantioenriched **27** as a brown solid. The spectroscopic properties of this compound were identical to that of compound racemic **27** described above. The purified nonracemic material **27** (14.4 mg, 0.04 mmol) was dissolved in dichloromethane (1 mL) and stirred at rt. NaH (4.8 mg, 0.12 mmol, 60% dispersion in mineral oil) was added and the mixture was allowed to stir at rt for 10 min. Neat (S)-(+)- $\alpha$ -Methoxy- $\alpha$ -trifluoromethylphenylacetyl chloride (11  $\mu\text{L}$ , 0.06 mmol) was added via syringe and the mixture was stirred at rt until the starting material had been consumed as judged by ESI<sup>+</sup> MS analysis of an aliquot removed from the reaction mixture (ca. 1 hr). Brine (2 mL) was added and the biphasic mixture was transferred to a separatory funnel. The layers were separated and the aqueous layer was extracted with dichloromethane (2 x 4 mL). The combined organic layers were dried over anhydrous sodium sulfate, filtered, and concentrated *in vacuo*. This procedure afforded a crude mixture that was determined to be a 48:52 mixture of diastereomers by  $^1\text{H}$  NMR analysis. The crude material was purified by flash chromatography on silica gel to afford 10.8 mg (48%) of the title compound as a pale brown foamy-oil and as a 51:49 mixture of diastereomers. Spectroscopic data were identical to those described above (although integration ratios differed due to the differences in product distribution).

---

## References

- (1) Harada, H.; Thalji, R. K.; Bergman, R. G.; Ellman, J. A. *J. Org. Chem.* **2008**, *73*, 6772–6779.
- (2) Donets, P. A.; Van der Eycken, E. V. *Synthesis* **2011**, *13*, 2147–2153.
- (3) Yong, Y. F.; Kowalski, J. A.; Lipton, M. A. *J. Org. Chem.* **1997**, *62*, 1540–1542.
- (4) Fell, J. B.; Coppola, G. M. *Synth. Commun.* **1995**, *25*, 43-47.
- (5) Chaudhari, P. S.; Dangate, P. S.; Akamanchi, K. G. *Synlett* **2010**, 3065-3067.
- (6) Li, D.; Guang, J.; Zhang, W.-X.; Wang, Y.; Xi, Z. *Org. Biomol. Chem.* **2010**, *8*, 1816-1820.

STANDARD 1H OBSERVE - profile

Sample Name:

Data Collected on:

Yb-vnars700

Archive directory:

Sample directory:

FidFile: NRB-4-190-1H

Pulse Sequence: PROTON (s2pul)

Solvent: cdcl3

Data collected on: Apr 12 2013

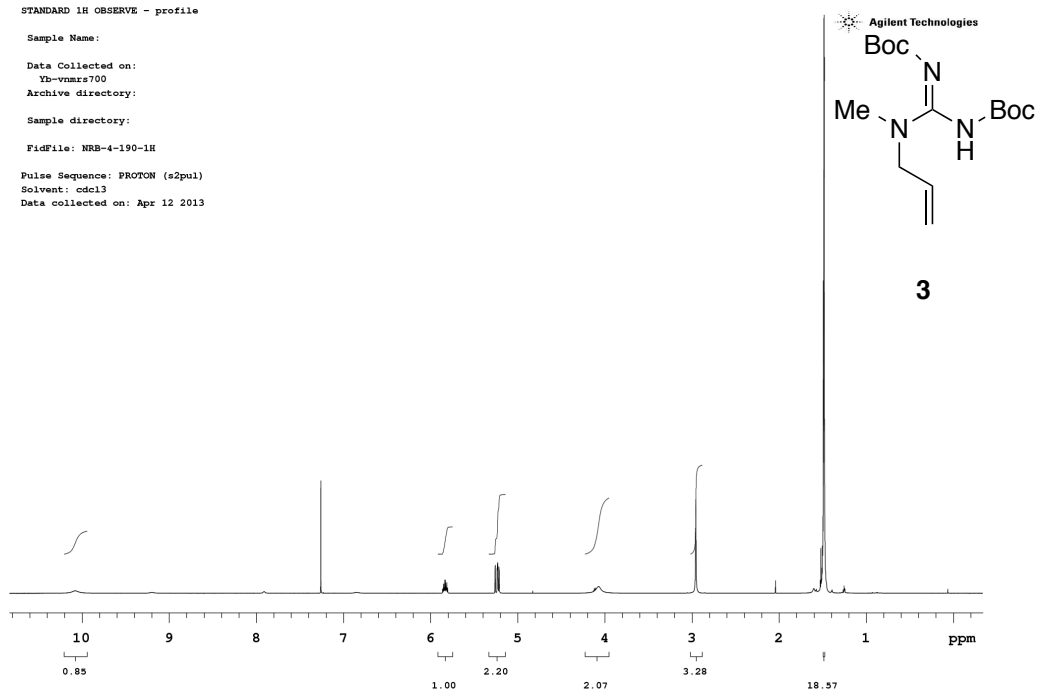

Sample Name:

Data Collected on:

Yb-vnars700

Archive directory:

Sample directory:

FidFile: NRB-4-190-13C

Pulse Sequence: CARBON (s2pul)

Solvent: cdcl3

Data collected on: Apr 12 2013

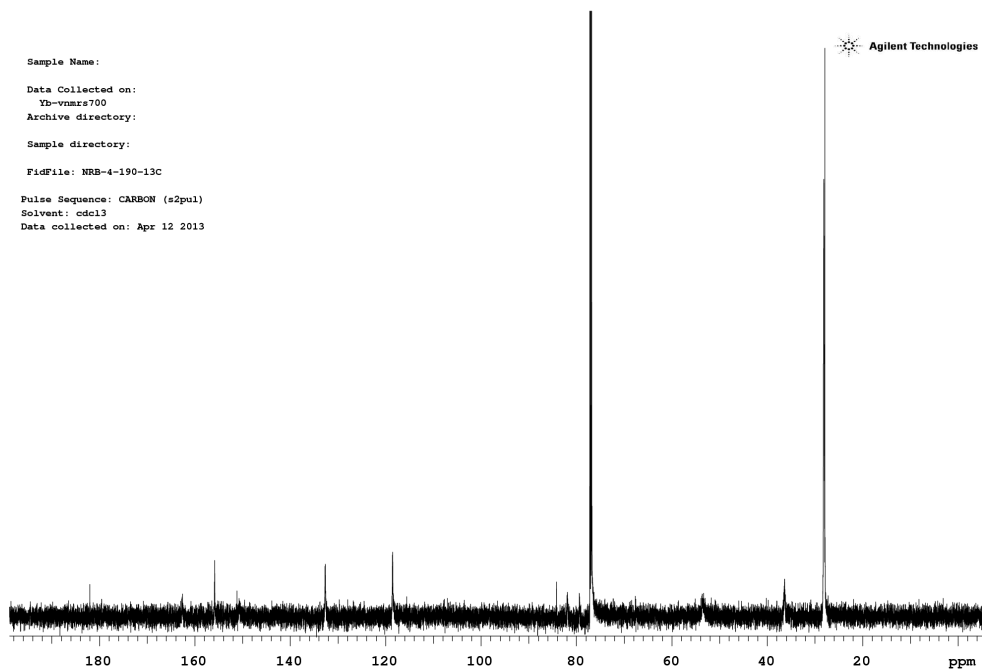



STANDARD 1H OBSERVE

Agilent Technologies

Sample Name:  
Data Collected on:  
Co. Chem LSA.UMich.edu-vnmrs400  
Archive directory:  
Sample directory:  
FidFile: BPZ-1-123  
Pulse Sequence: PROTON (s2pul)  
Solvent: cdcl3  
Data collected on: Jan 19 2012

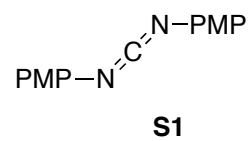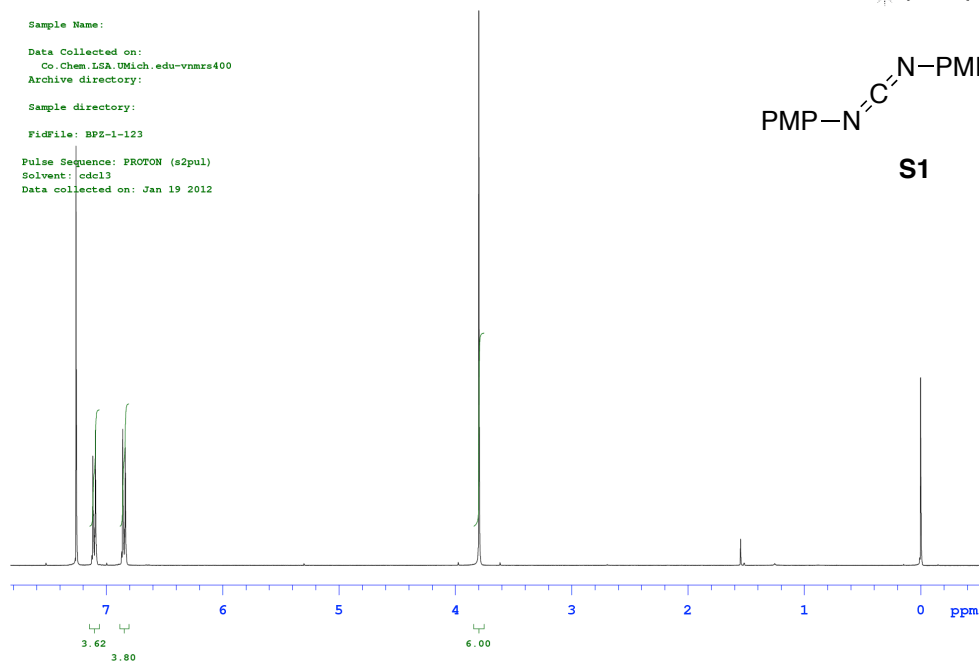

STANDARD PROTON PARAMETERS

Sample Name:  
Data Collected on:  
Te-vnmrs500  
Archive directory:  
Sample directory:  
FidFile: BPZ-2-73F  
Pulse Sequence: PROTON (s2pul)  
Solvent: cdcl3  
Data collected on: Jan 14 2013

Agilent Technologies

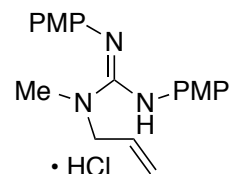

4

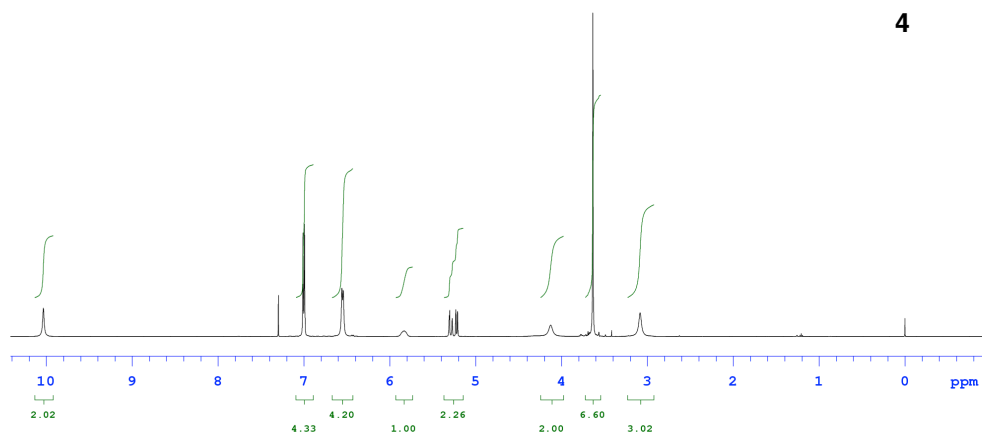

STANDARD PROTON PARAMETERS

Sample Name:  
Data Collected on:  
Te-vnmrs500  
Archive directory:  
Sample directory:  
FidFile: BPZ-2-73G  
Pulse Sequence: CARBON (s2pul)  
Solvent: cdcl3  
Data collected on: Jan 14 2013

Agilent Technologies

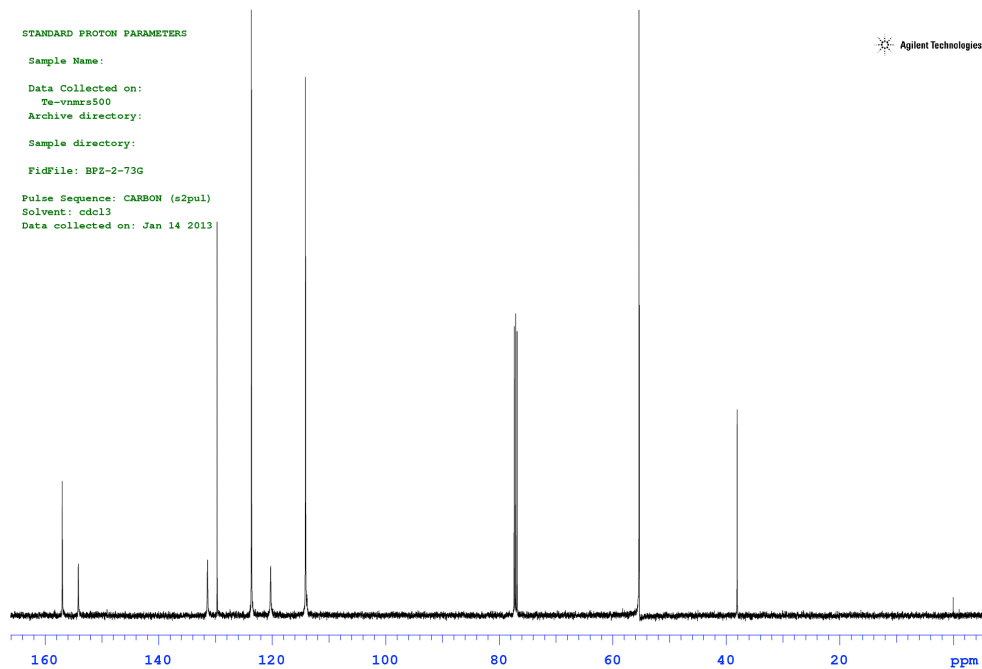

STANDARD PROTON PARAMETERS

Sample Name:  
Data Collected on:  
Te-vnmr500  
Archive directory:  
Sample directory:  
FidFile: BPZ-2-95  
Pulse Sequence: PROTON (s2pul)  
Solvent: cdcl3  
Data collected on: Feb 26 2013

Agilent Technologies

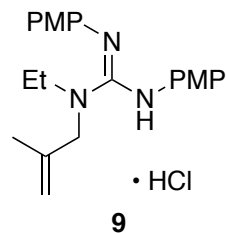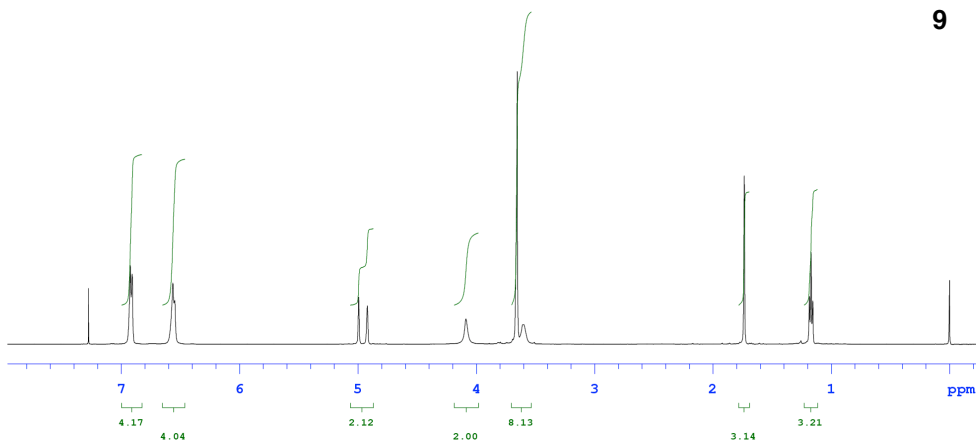

Sample Name:  
Data Collected on:  
Yb-vnmr700  
Archive directory:  
Sample directory:  
FidFile: BPZ-2-95CC  
Pulse Sequence: CARBON (s2pul)  
Solvent: cdcl3  
Data collected on: May 4 2013

Agilent Technologies

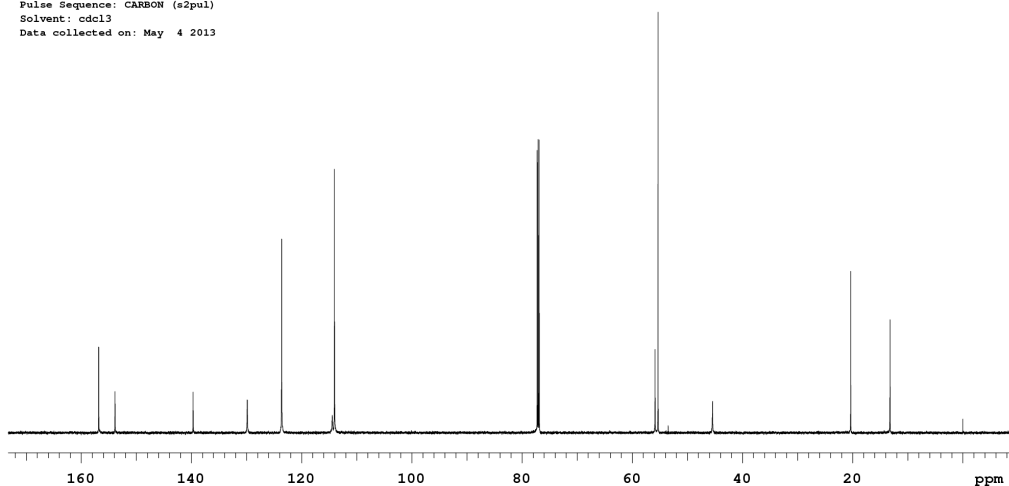

STANDARD PROTON PARAMETERS

Sample Name:  
Data Collected on:  
Te-vnmrs500  
Archive directory:  
Sample directory:  
FidFile: NRB-4-193-1H  
Pulse Sequence: PROTON (s2pul)  
Solvent: cdcl3  
Data collected on: Apr 29 2013

Agilent Technologies

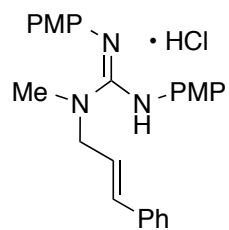

10a

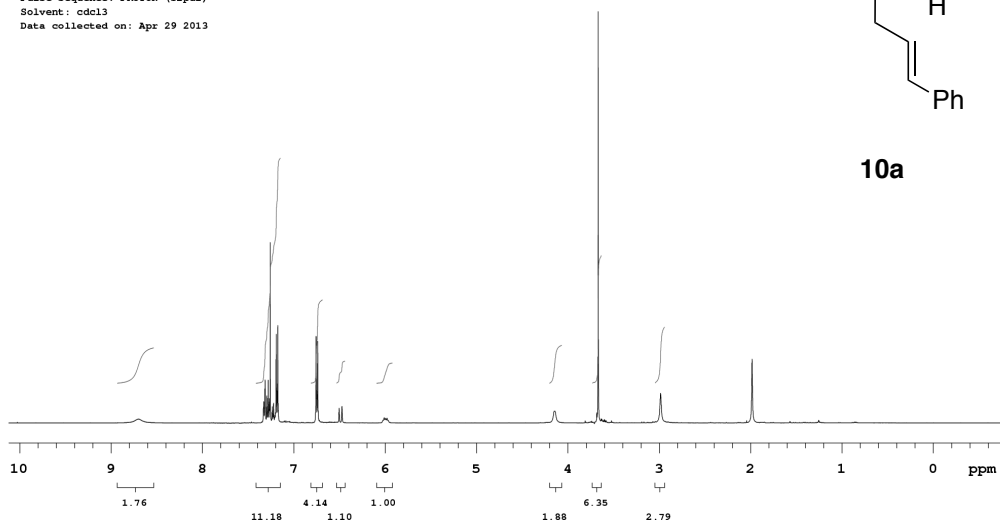

Sample Name:  
Data Collected on:  
Yb-vnmrs700  
Archive directory:  
Sample directory:  
FidFile: NRB-4-193-13C  
Pulse Sequence: CARBON (s2pul)  
Solvent: cdcl3  
Data collected on: Apr 29 2013

Agilent Technologies

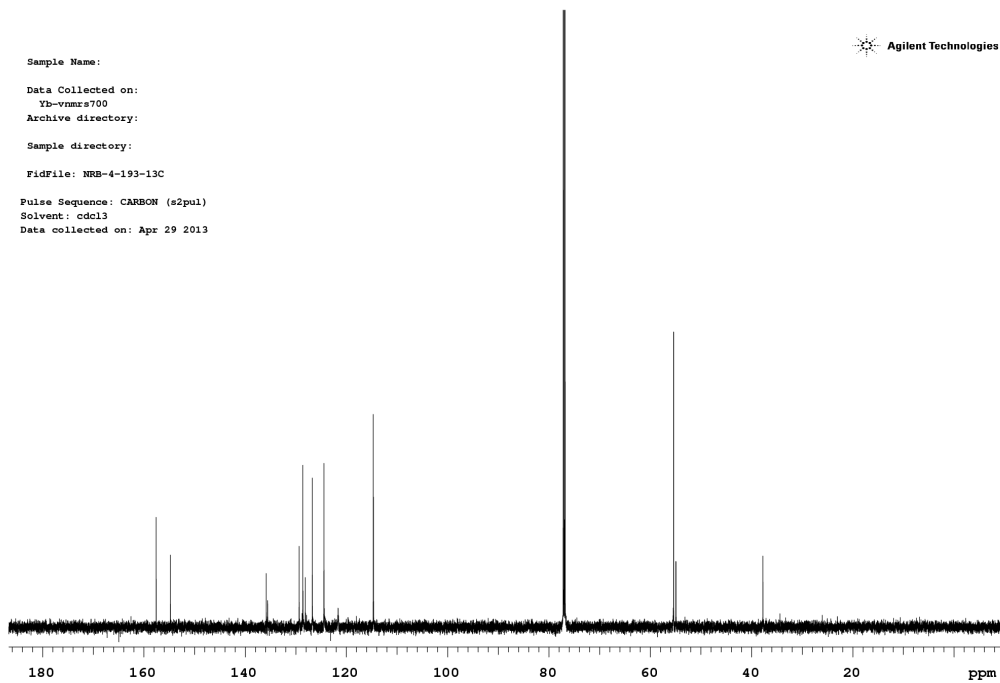

STANDARD Deuterium PARAMETERS  
Using lock coil  
Sample Name:  
Data Collected on:  
sn.chem.lsa.umich.edu-inova500  
Archive directory:  
Sample directory:  
FidFile: BPZ-2-146-13  
Pulse Sequence: PROTON (s2pul)  
Solvent: cdcl3  
Data collected on: Oct 3 2013

Agilent Technologies

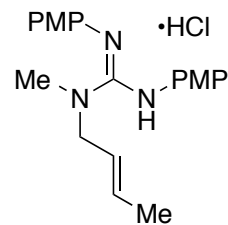

10b

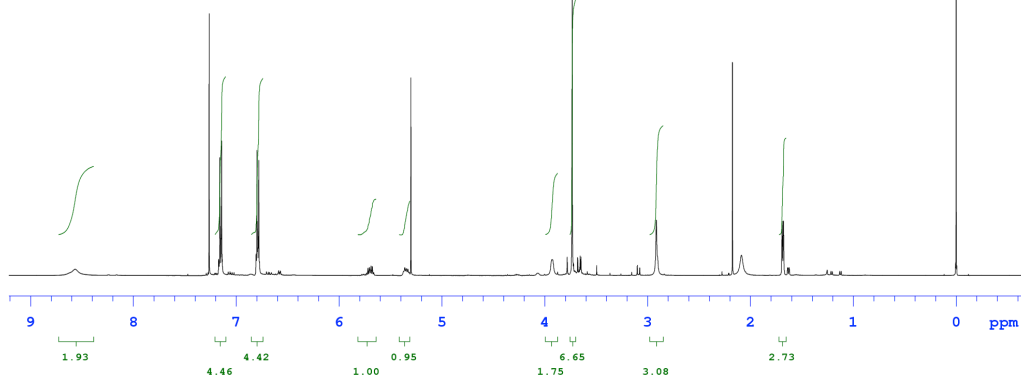

STANDARD PROTON PARAMETERS  
Sample Name:  
Data Collected on:  
te.chem.lsa.umich.edu-vnmrs500  
Archive directory:  
Sample directory:  
FidFile: BPZ-2-146CF  
Pulse Sequence: CARBON (s2pul)  
Solvent: cdcl3  
Data collected on: Oct 4 2013

Agilent Technologies

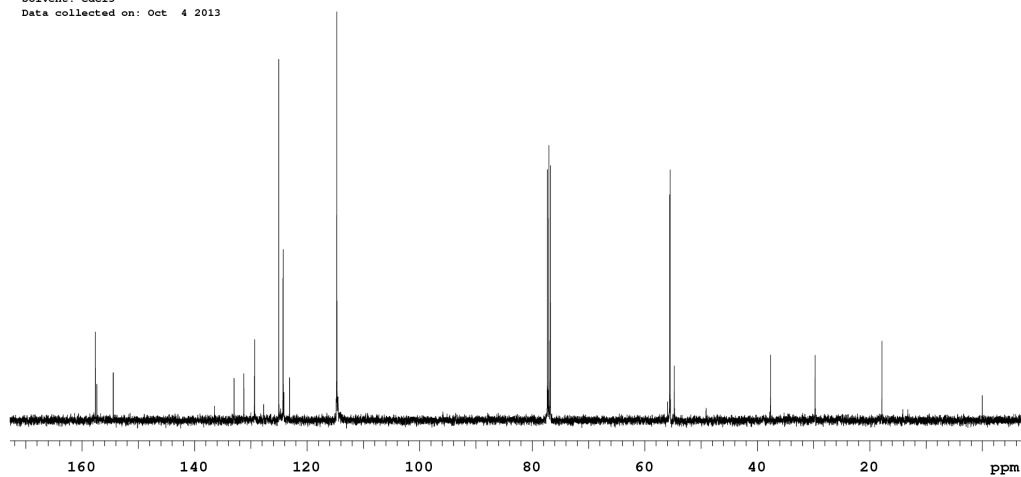

Automated Probe tuning parameter  
Sample Name:  
Data Collected on:  
yb.chem.lsa.umich.edu-vnmrs700  
Archive directory:  
Sample directory:  
FidFile: NRB-5-041-CD30D  
Pulse Sequence: PROTON (s2pul)  
Solvent: cd3od  
Data collected on: Jul 22 2013

Agilent Technologies

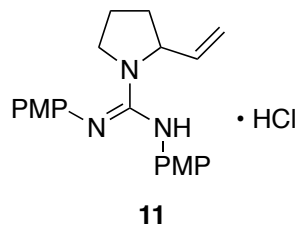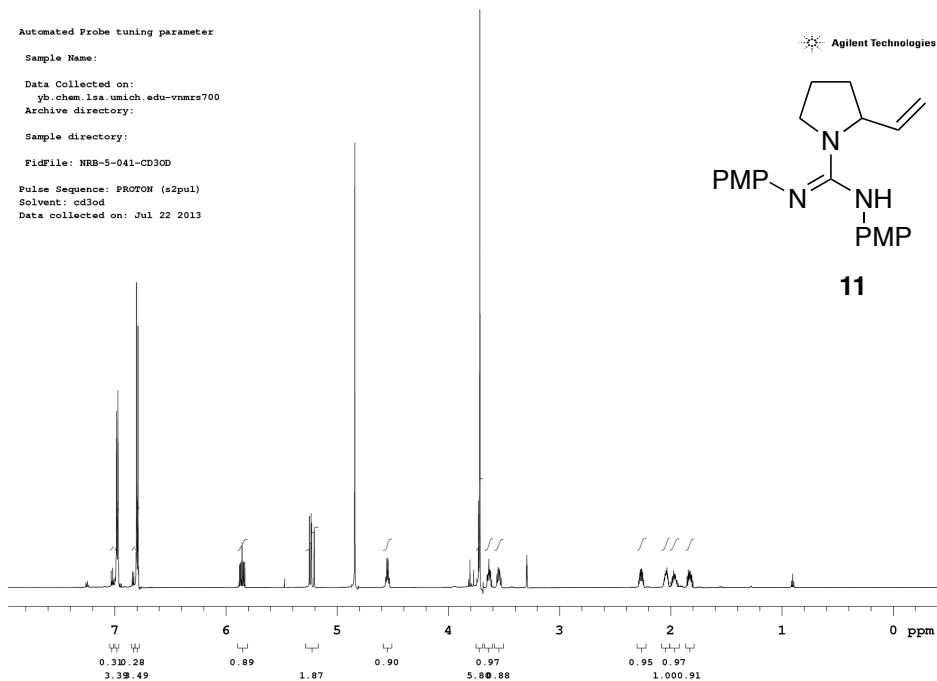

Proton Spectrum  
Sample Name:  
Data Collected on:  
yb.chem.lsa.umich.edu-vnmrs700  
Archive directory:  
Sample directory:  
FidFile: NRB-5-041-C13-CD30D  
Pulse Sequence: CARBON (s2pul)  
Solvent: cd3od  
Data collected on: Jul 22 2013

Agilent Technologies

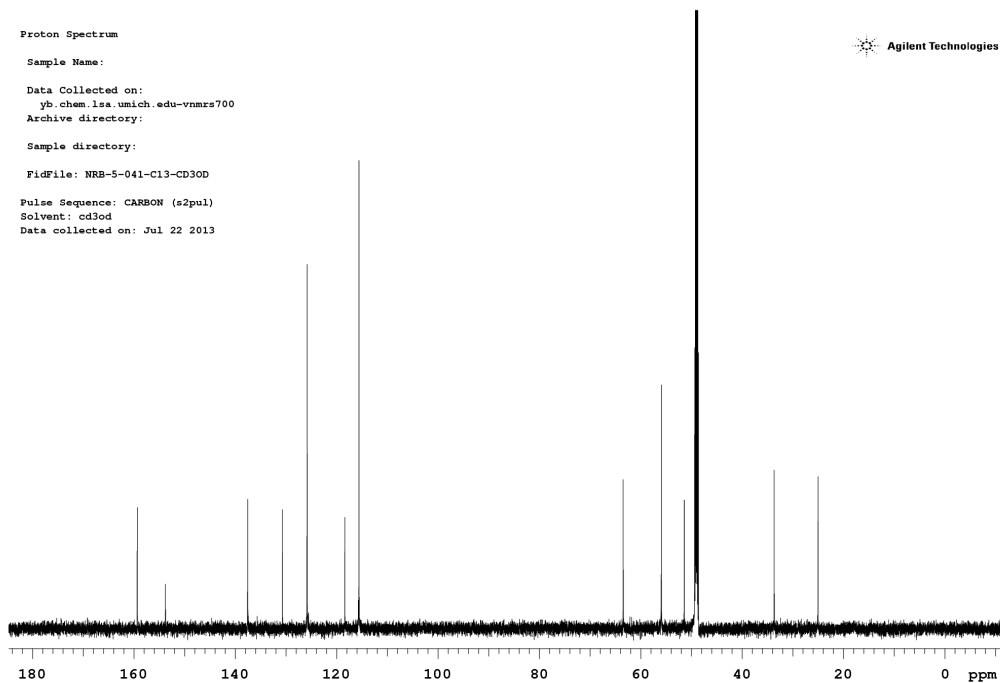

STANDARD PROTON PARAMETERS

Sample Name:  
Data Collected on:  
te.chem.lsa.umich.edu-vmrs500  
Archive directory:  
Sample directory:  
FidFile: NRB-5-93C  
Pulse Sequence: PROTON (s2pul)  
Solvent: cd3od  
Data collected on: Sep 27 2013

Agilent Technologies

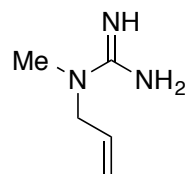

•HOTFA

28

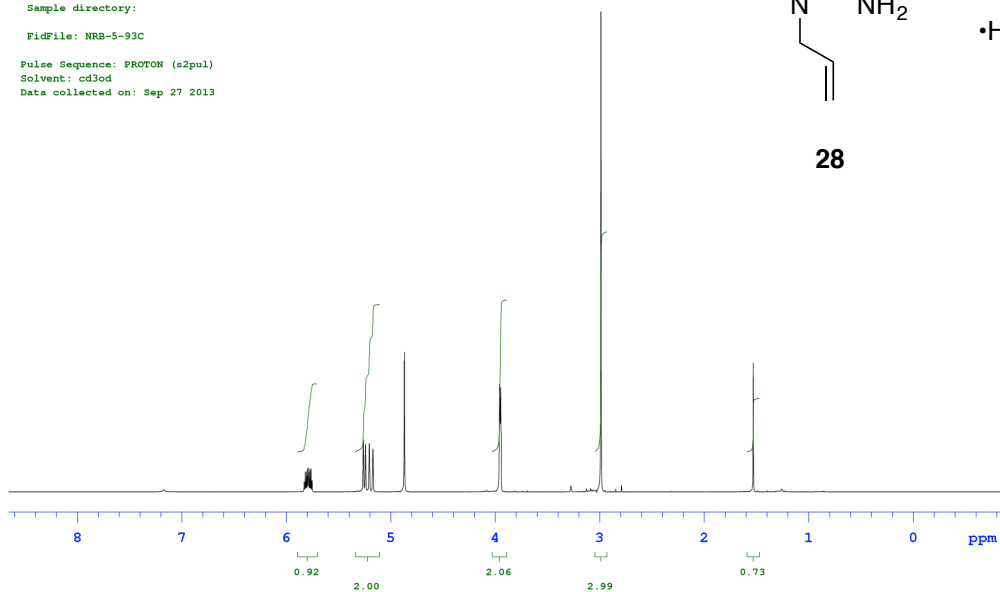

STANDARD PROTON PARAMETERS

Sample Name:  
Data Collected on:  
te.chem.lsa.umich.edu-vmrs500  
Archive directory:  
Sample directory:  
FidFile: NRB-5-93CC  
Pulse Sequence: CARBON (s2pul)  
Solvent: cd3od  
Data collected on: Sep 27 2013

Agilent Technologies

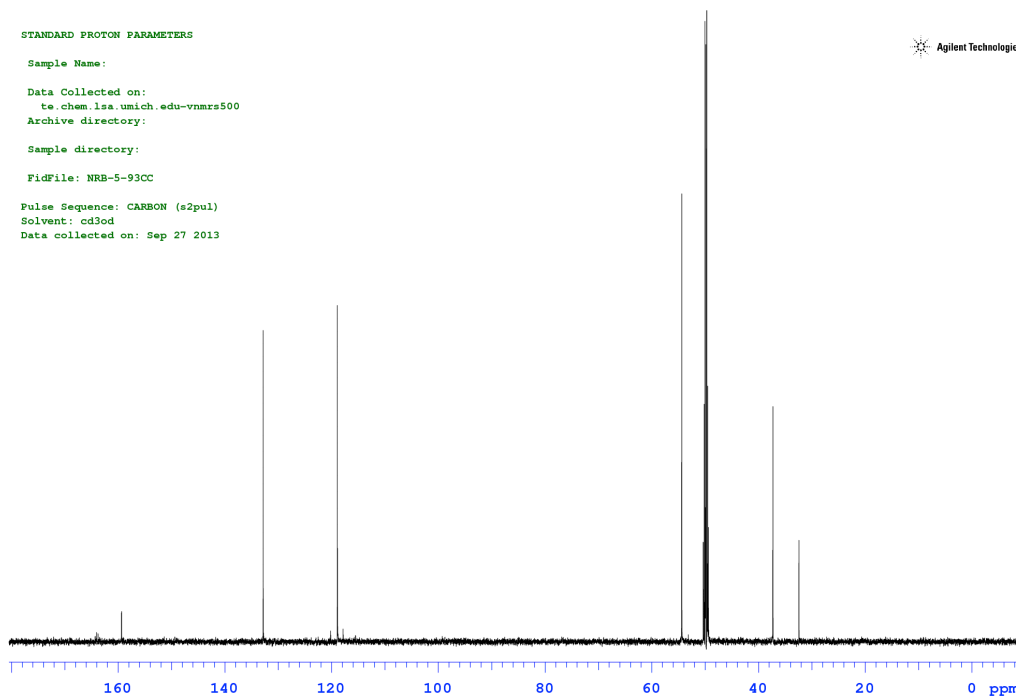

STANDARD 1H OBSERVE - profile

Sample Name:  
Data Collected on:  
Yb-vnmrs700  
Archive directory:  
Sample directory:  
FidFile: NRB-4-190-F-1H  
Pulse Sequence: PROTON (s2pul)  
Solvent: cdcl3  
Data collected on: Apr 13 2013

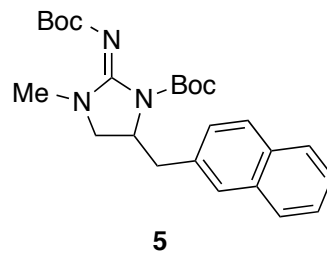

Agilent Technologies

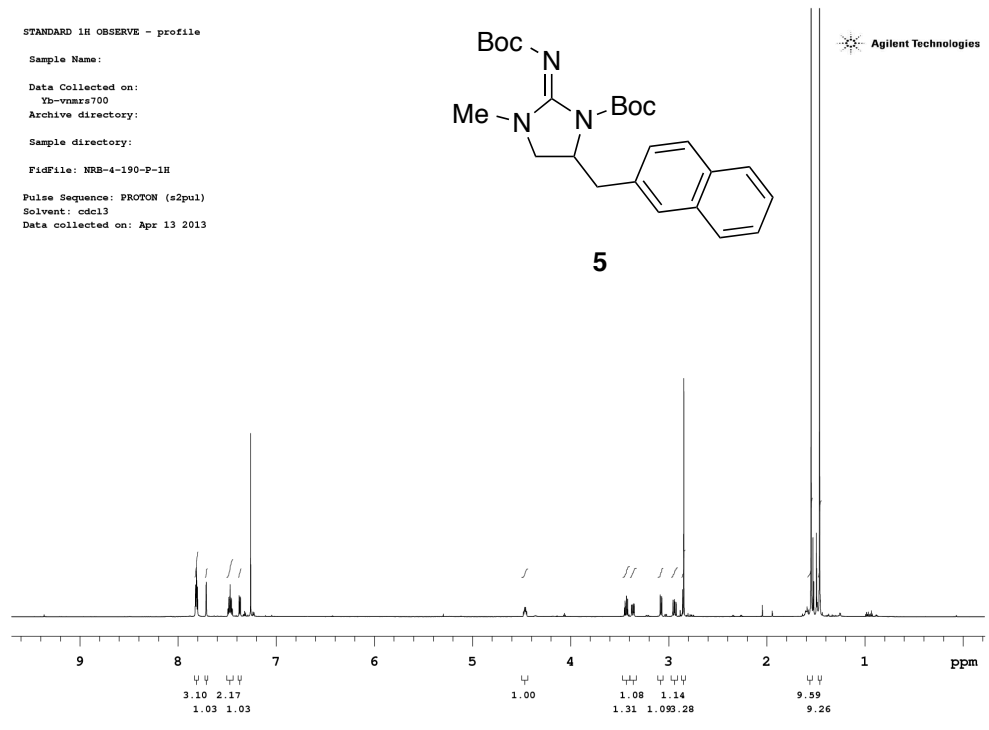

Proton Spectrum  
Sample Name:  
Data Collected on:  
yb.chem.lsa.umich.edu-vnmrs700  
Archive directory:  
Sample directory:  
FidFile: NRB-4-190-C13  
Pulse Sequence: CARBON (s2pul)  
Solvent: cdcl3  
Data collected on: Aug 7 2013

Agilent Technologies

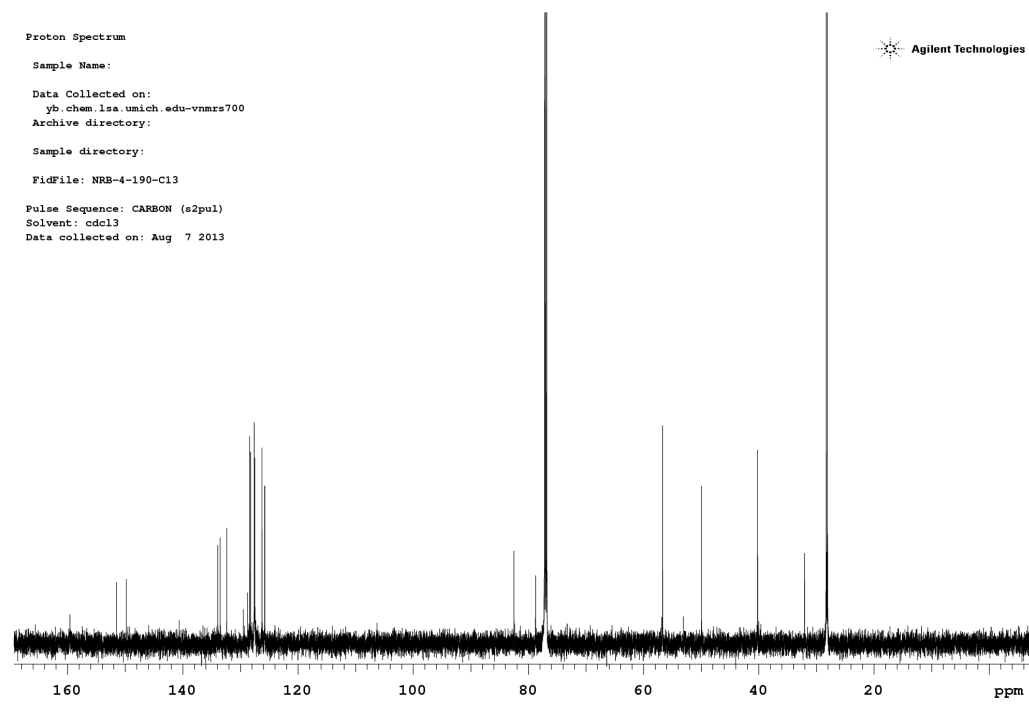



Automated Probe tuning parameter

Sample Name:

Data Collected on:  
yb.chem.lsa.umich.edu-vmrs700

Archive directory:

Sample directory:

FidFile: PROTON

Pulse Sequence: PROTON (s2pul)  
Solvent: cdcl3  
Data collected on: Jul 7 2013

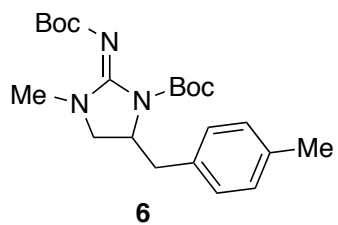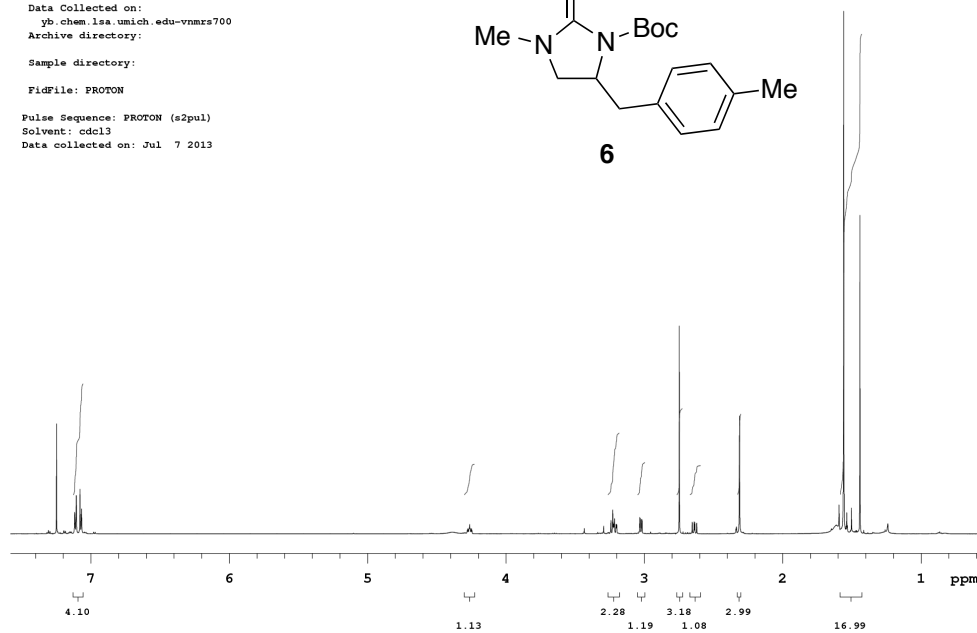

Proton Spectrum

Sample Name:

Data Collected on:  
yb.chem.lsa.umich.edu-vmrs700

Archive directory:

Sample directory:

FidFile: NRB-5-019-13C

Pulse Sequence: CARBON (s2pul)  
Solvent: cdcl3  
Data collected on: Jul 7 2013

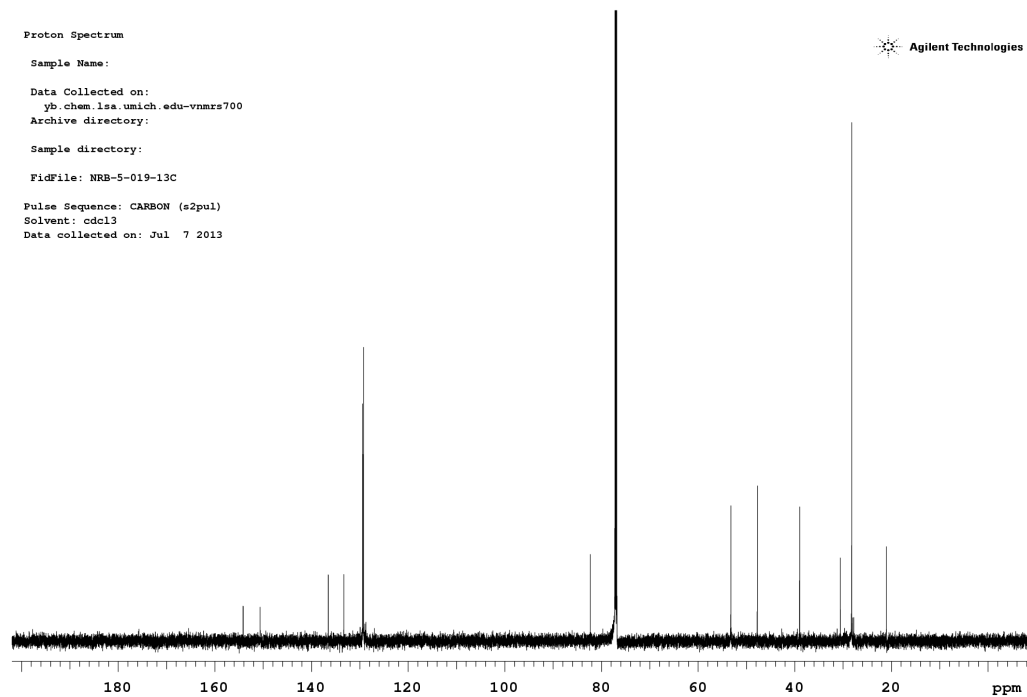

STANDARD PROTON PARAMETERS

Sample Name:  
 Data Collected on:  
 Te-vnmrs500  
 Archive directory:  
 Sample directory:  
 FidFile: BPZ-2-98A  
 Pulse Sequence: PROTON (s2pul)  
 Solvent: cdcl3  
 Data collected on: Mar 1 2013

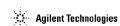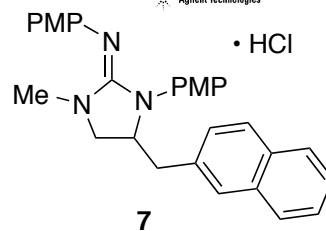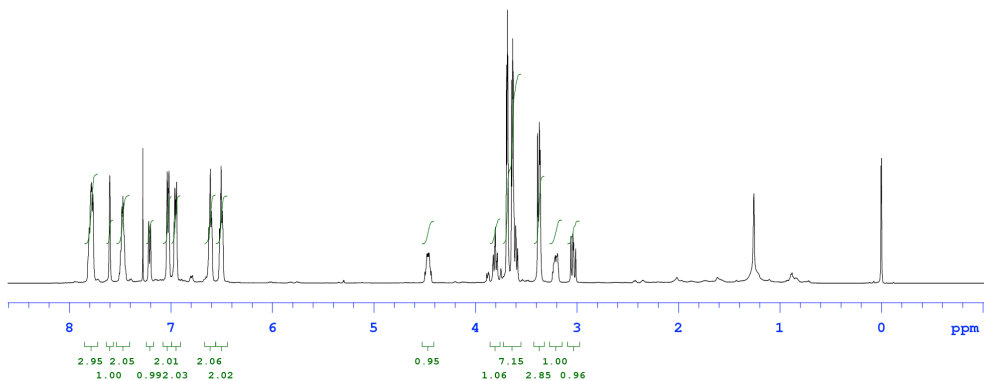

STANDARD PROTON PARAMETERS

Sample Name:  
 Data Collected on:  
 Te-vnmrs500  
 Archive directory:  
 Sample directory:  
 FidFile: BPZ-2-98C  
 Pulse Sequence: CARBON (s2pul)  
 Solvent: cdcl3  
 Data collected on: Mar 1 2013

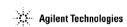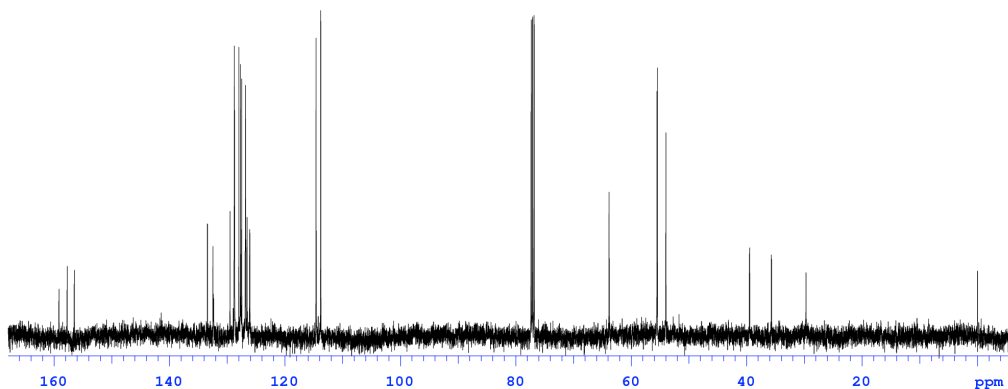

## STANDARD PROTON PARAMETERS

Sample Name:

Data Collected on:

Te-vnmrs500

Archive directory:

Sample directory:

FidFile: BPZ-2-79A

Pulse Sequence: PROTON (s2pul)

Solvent: cdcl3

Data collected on: Jan 23 2013

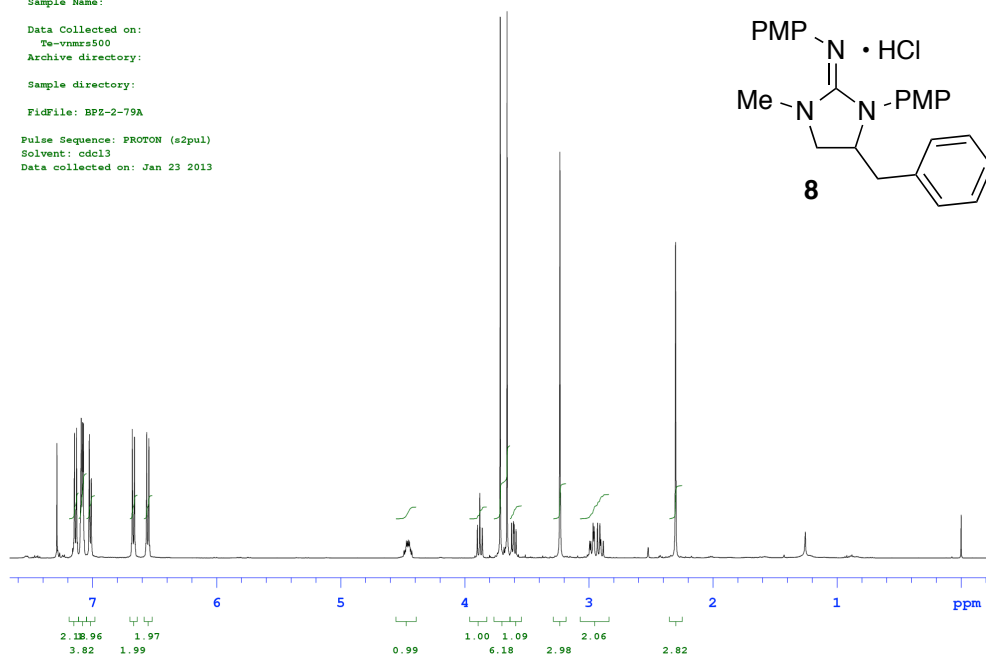

## STANDARD PROTON PARAMETERS

Sample Name:

Data Collected on:

Te-vnmrs500

Archive directory:

Sample directory:

FidFile: BPZ-2-79C

Pulse Sequence: CARBON (s2pul)

Solvent: cdcl3

Data collected on: Jan 23 2013

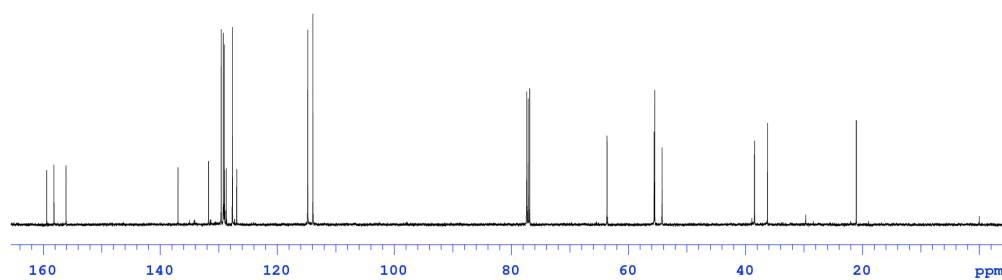

STANDARD PROTON PARAMETERS

Sample Name:  
 Data Collected on:  
 Te-vnmrs500  
 Archive directory:  
 Sample directory:  
 FidFile: BPZ-2-82B  
 Pulse Sequence: PROTON (s2pul)  
 Solvent: cdcl3  
 Data collected on: Jan 30 2013

Agilent Technologies

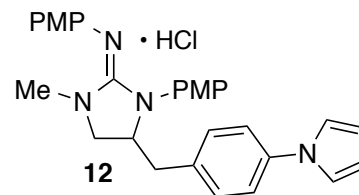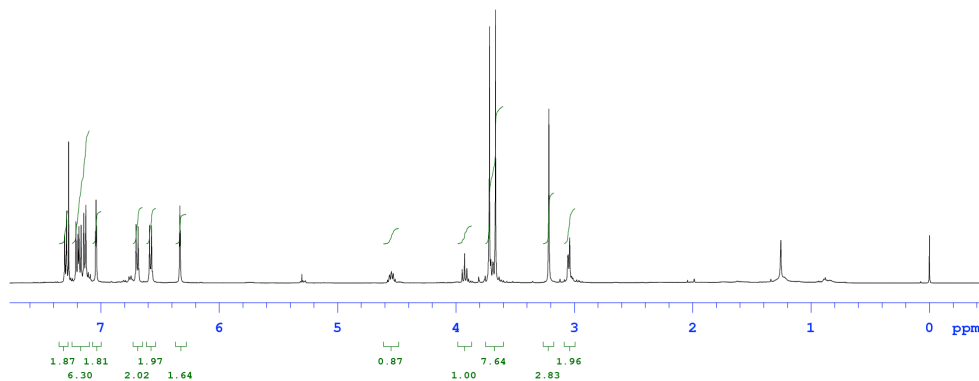

STANDARD PROTON PARAMETERS

Sample Name:  
 Data Collected on:  
 Te-vnmrs500  
 Archive directory:  
 Sample directory:  
 FidFile: BPZ-2-82C  
 Pulse Sequence: CARBON (s2pul)  
 Solvent: cdcl3  
 Data collected on: Jan 30 2013

Agilent Technologies

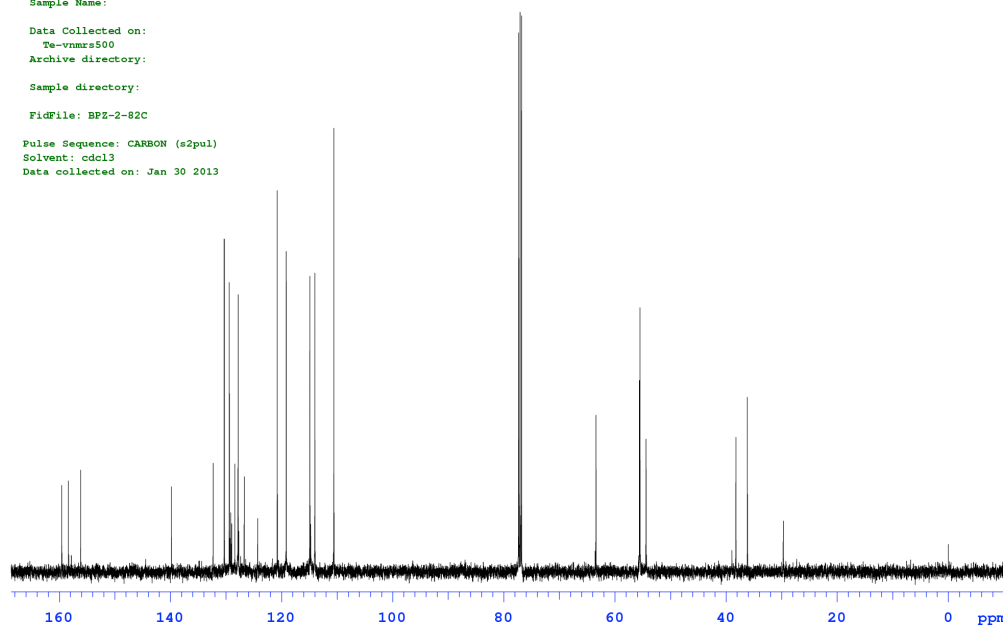

STANDARD PROTON PARAMETERS

Sample Name:  
 Data Collected on:  
 Te-vnmrs500  
 Archive directory:  
 Sample directory:  
 FidFile: BPZ-2-86A  
 Pulse Sequence: PROTON (s2pul)  
 Solvent: cdcl3  
 Data collected on: Feb 6 2013

Agilent Technologies

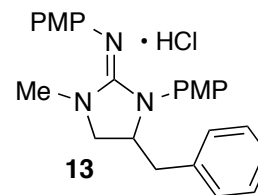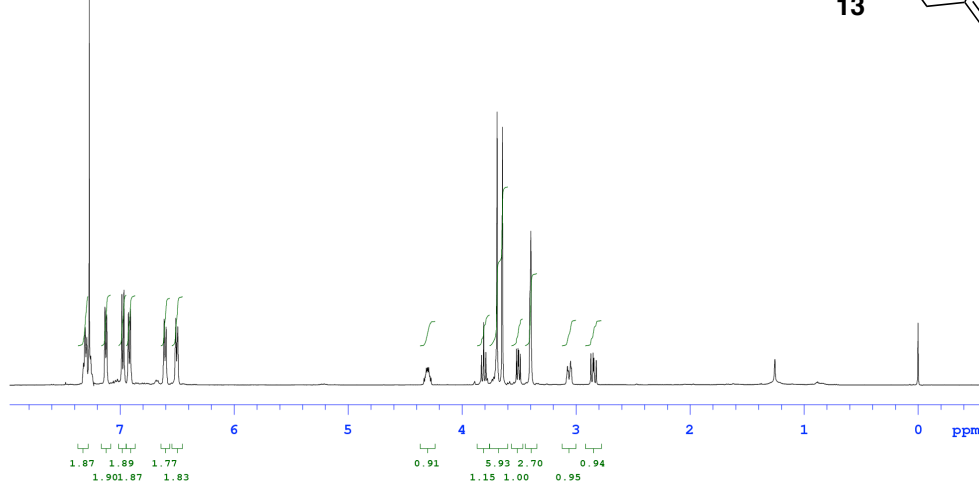

STANDARD PROTON PARAMETERS

Sample Name:  
 Data Collected on:  
 Te-vnmrs500  
 Archive directory:  
 Sample directory:  
 FidFile: BPZ-2-86C  
 Pulse Sequence: CARBON (s2pul)  
 Solvent: cdcl3  
 Data collected on: Feb 6 2013

Agilent Technologies

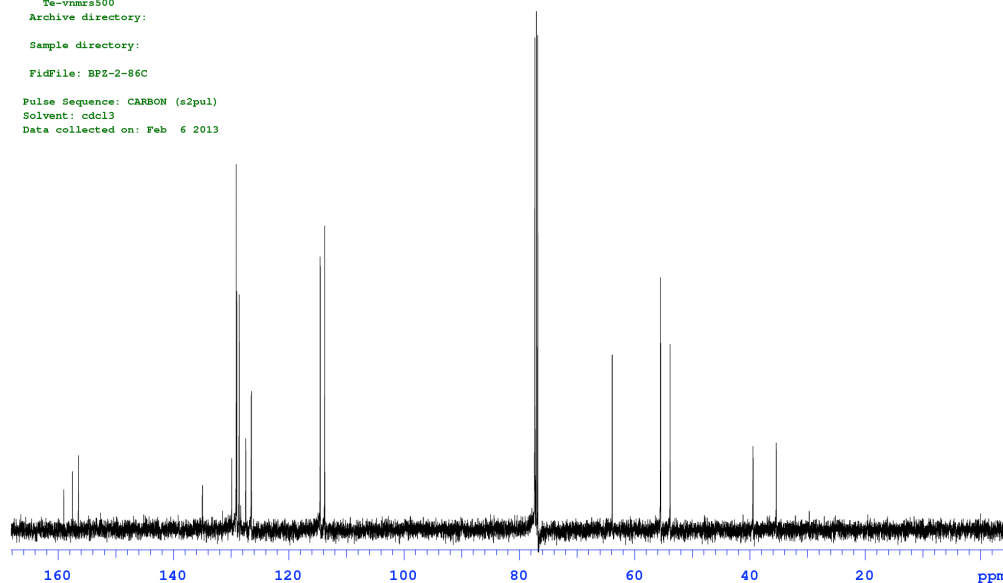

## STANDARD PROTON PARAMETERS

Sample Name:

Data Collected on:  
Te-vnmrs500

Archive directory:

Sample directory:

FidFile: BPZ-2-84B

Pulse Sequence: PROTON (s2pul)

Solvent: cdcl3

Data collected on: Feb 1 2013

Agilent Technologies

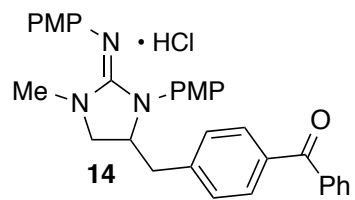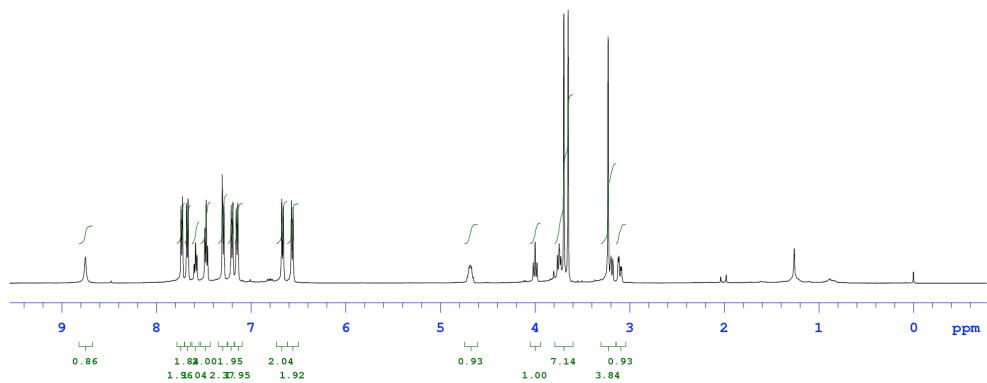

## STANDARD PROTON PARAMETERS

Sample Name:

Data Collected on:  
Te-vnmrs500

Archive directory:

Sample directory:

FidFile: BPZ-2-84C

Pulse Sequence: CARBON (s2pul)

Solvent: cdcl3

Data collected on: Feb 1 2013

Agilent Technologies

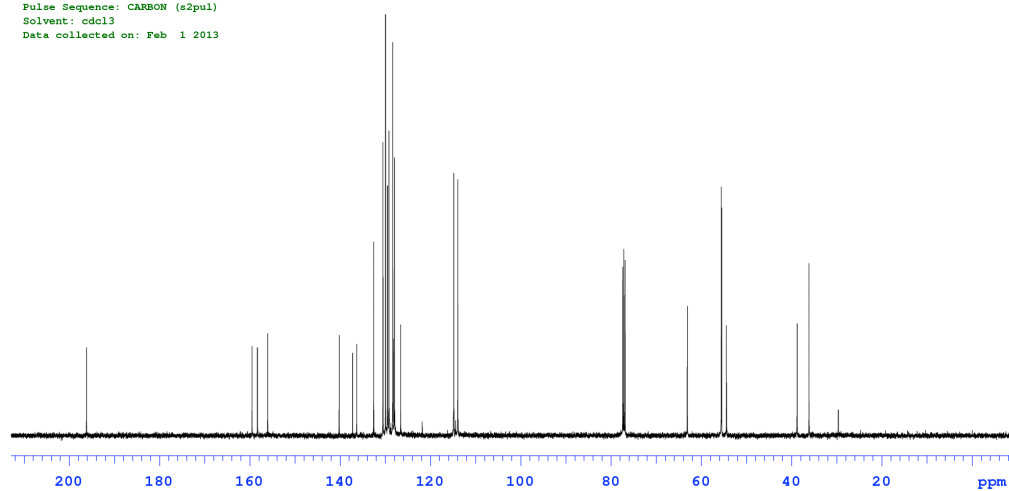

Sample Name:  
 Data Collected on:  
 Yb-vmrs700  
 Archive directory:  
 Sample directory:  
 FidFile: BPZ-2-108A  
 Pulse Sequence: PROTON (s2pul)  
 Solvent: cdcl3  
 Data collected on: Apr 1 2013

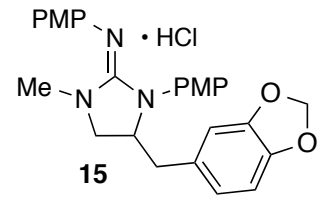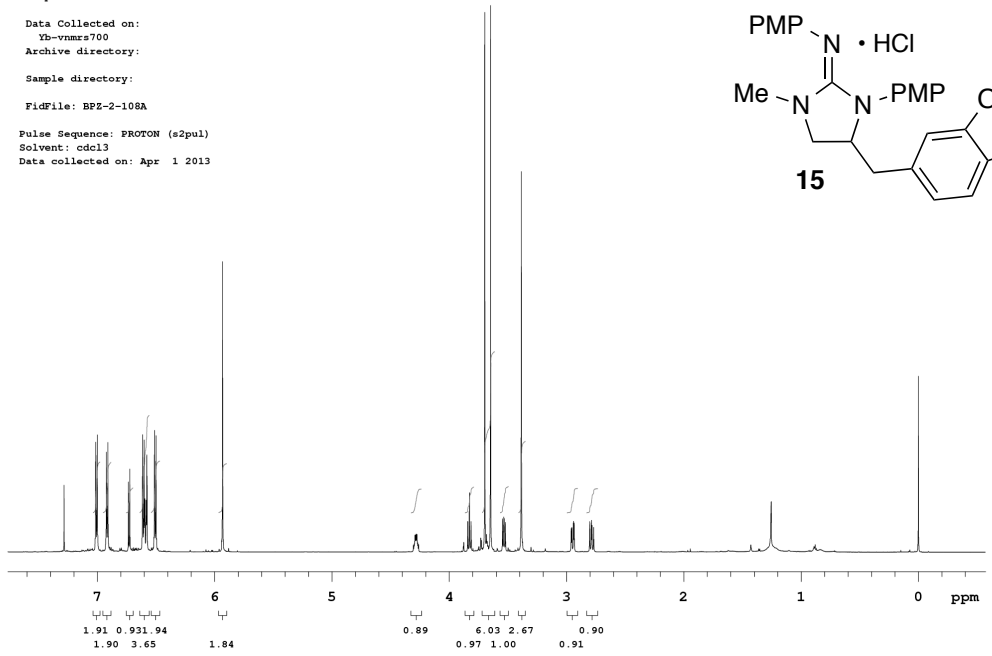

Sample Name:  
 Data Collected on:  
 Yb-vmrs700  
 Archive directory:  
 Sample directory:  
 FidFile: BPZ-2-108C  
 Pulse Sequence: CARBON (s2pul)  
 Solvent: cdcl3  
 Data collected on: Apr 1 2013

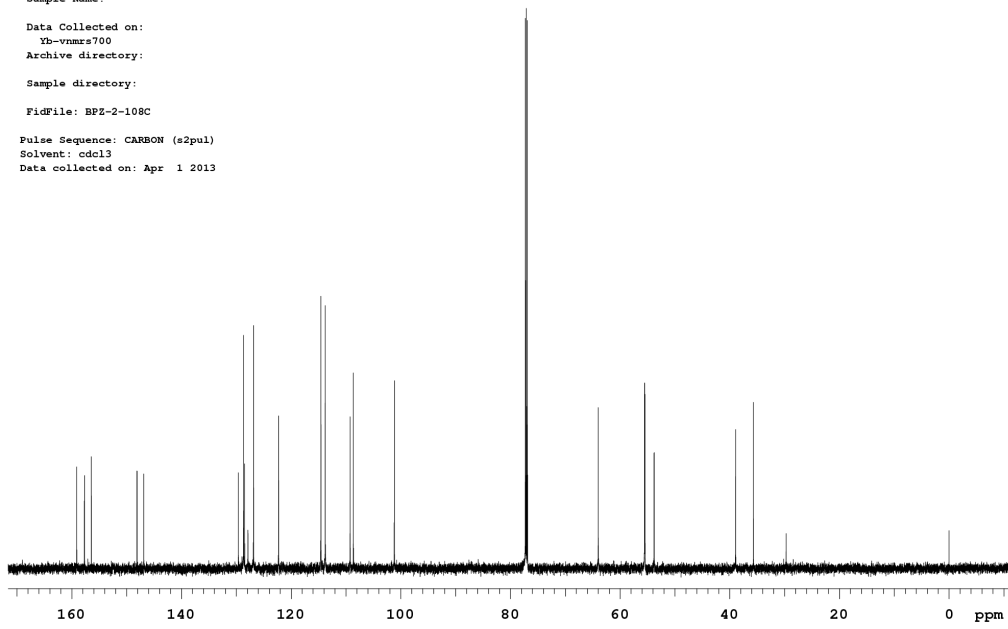

STANDARD PROTON PARAMETERS

Sample Name:  
 Data Collected on:  
 Te-vnmrs500  
 Archive directory:  
 Sample directory:  
 FidFile: BPZ-2-111A  
 Pulse Sequence: PROTON (s2pul)  
 Solvent: cdcl3  
 Data collected on: Apr 5 2013

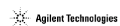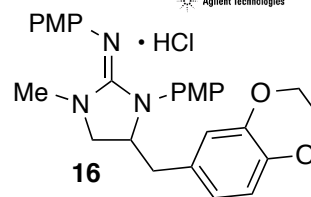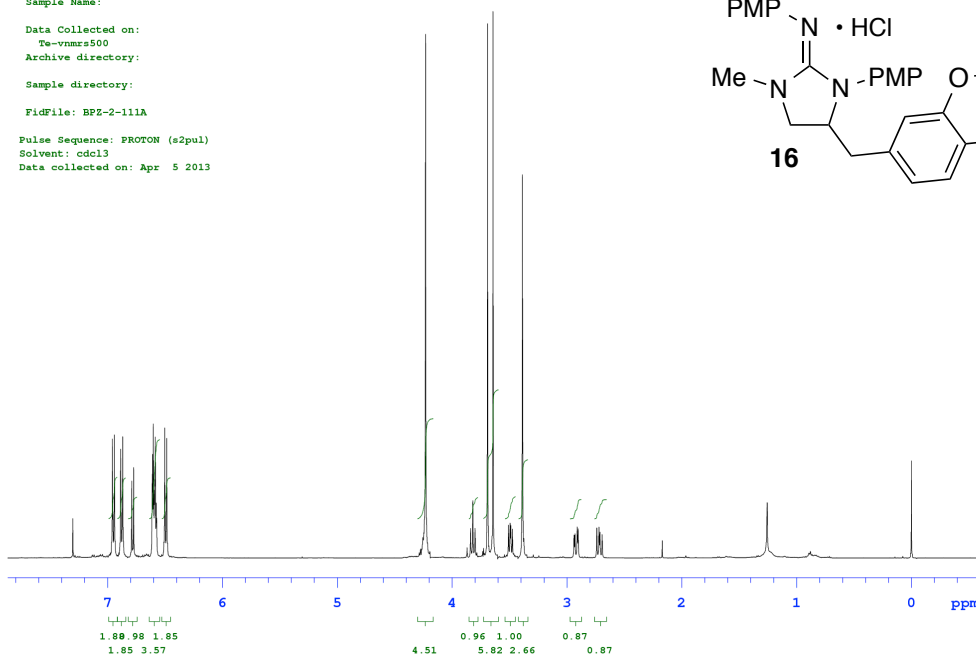

STANDARD PROTON PARAMETERS

Sample Name:  
 Data Collected on:  
 Te-vnmrs500  
 Archive directory:  
 Sample directory:  
 FidFile: BPZ-2-111C  
 Pulse Sequence: CARBON (s2pul)  
 Solvent: cdcl3  
 Data collected on: Apr 5 2013

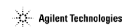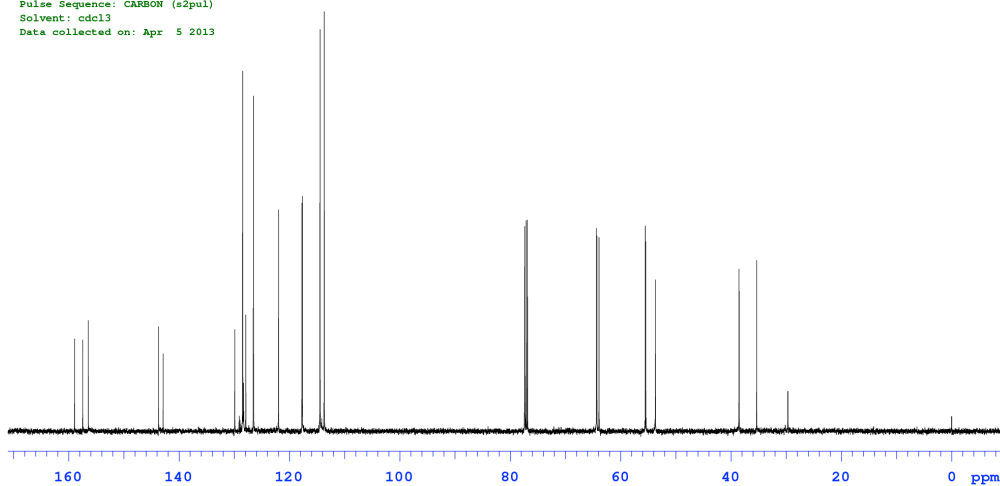



STANDARD 1H OBSERVE - profile

Sample Name:

Data Collected on:

Yb-vnmrs700

Archive directory:

Sample directory:

FidFile: BPZ-2-107CC

Pulse Sequence: PROTON (s2pul)

Solvent: cdcl3

Data collected on: Mar 30 2013

Agilent Technologies

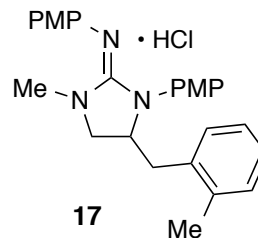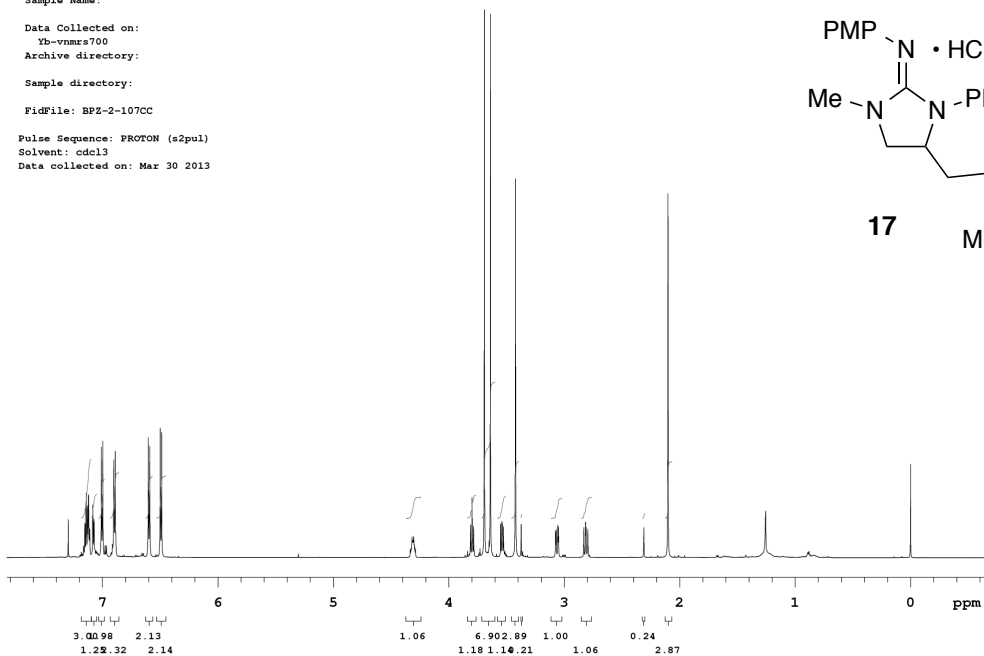

Sample Name:

Data Collected on:

Yb-vnmrs700

Archive directory:

Sample directory:

FidFile: BPZ-2-107CC-13C

Pulse Sequence: CARBON (s2pul)

Solvent: cdcl3

Data collected on: Mar 30 2013

Agilent Technologies

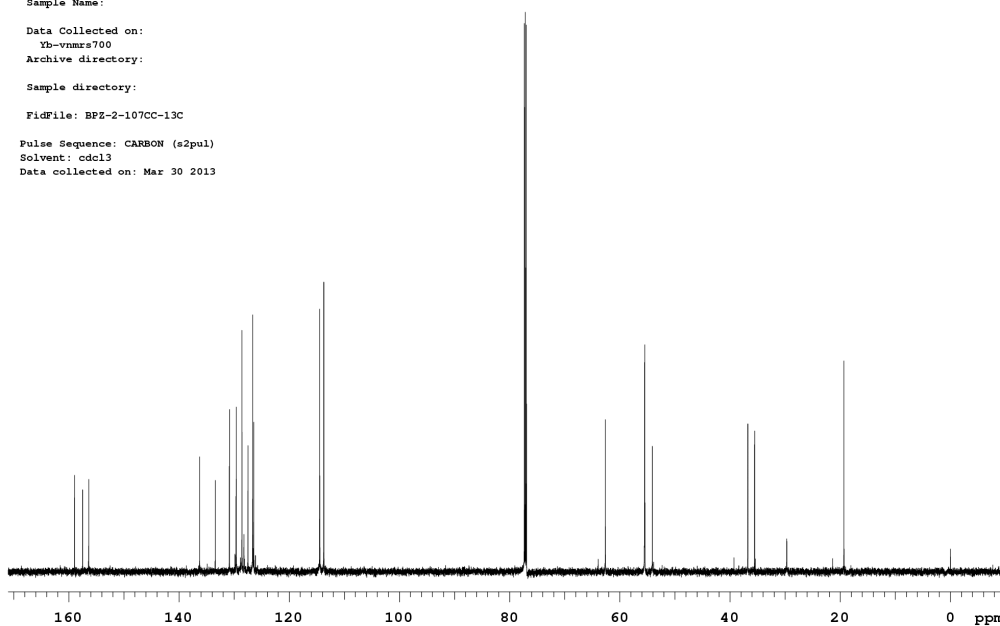

STANDARD PROTON PARAMETERS

Sample Name:  
 Data Collected on:  
 Te-vnmrs500  
 Archive directory:  
 Sample directory:  
 FidFile: BPZ-2-110AA  
 Pulse Sequence: PROTON (s2pul)  
 Solvent: cdcl3  
 Data collected on: Apr 5 2013

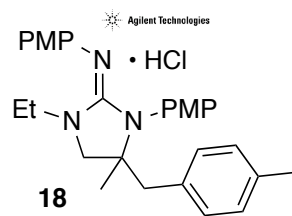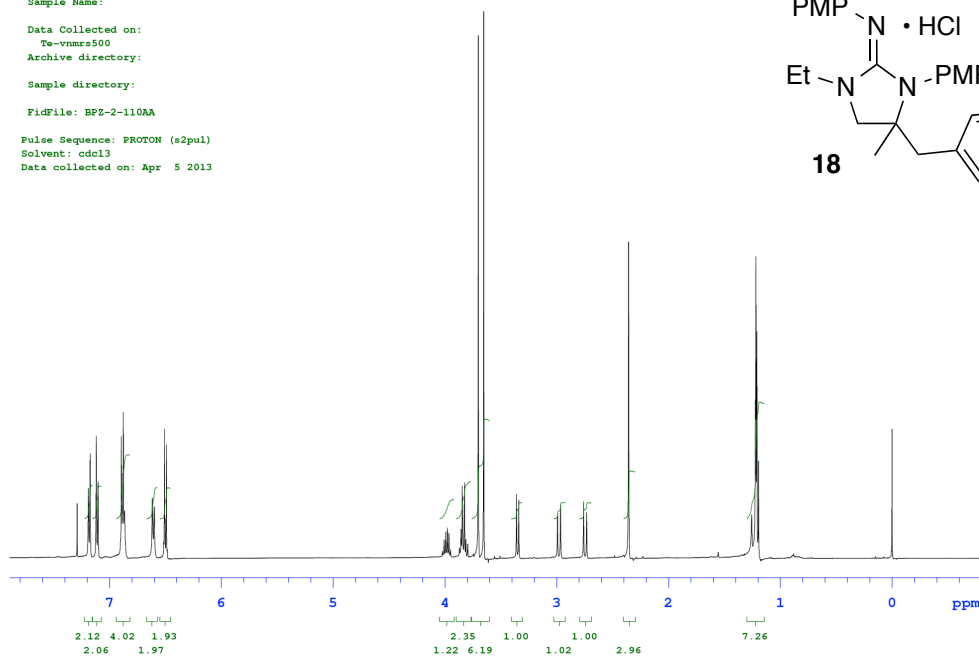

STANDARD PROTON PARAMETERS

Sample Name:  
 Data Collected on:  
 Te-vnmrs500  
 Archive directory:  
 Sample directory:  
 FidFile: BPZ-2-110C  
 Pulse Sequence: CARBON (s2pul)  
 Solvent: cdcl3  
 Data collected on: Apr 5 2013

Agilent Technologies

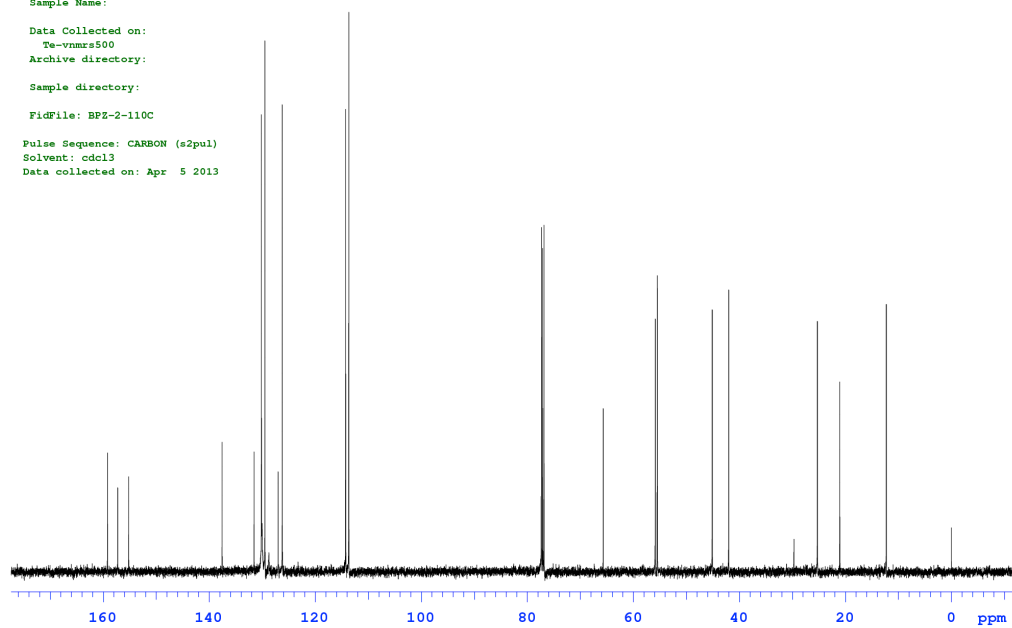

STANDARD PROTON PARAMETERS

Sample Name:  
 Data Collected on:  
 Te-vnmrs500  
 Archive directory:  
 Sample directory:  
 FidFile: BPZ-2-116A  
 Pulse Sequence: PROTON (s2pul)  
 Solvent: cdcl3  
 Data collected on: Apr 15 2013

Agilent Technologies

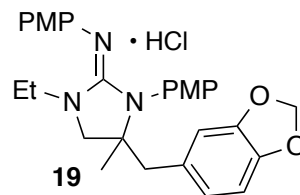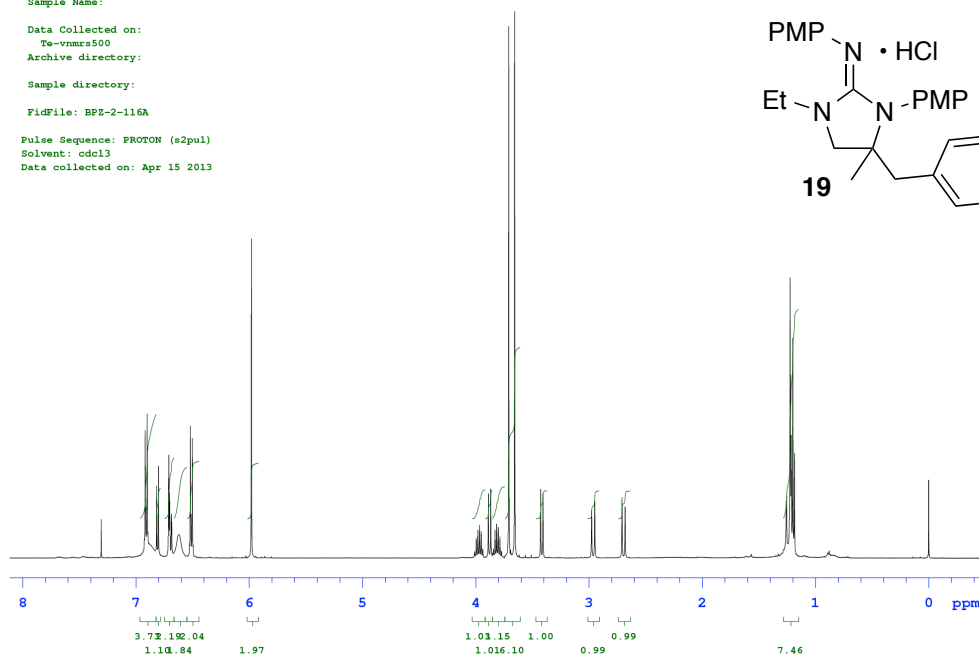

STANDARD PROTON PARAMETERS

Sample Name:  
 Data Collected on:  
 Te-vnmrs500  
 Archive directory:  
 Sample directory:  
 FidFile: BPZ-2-116C  
 Pulse Sequence: CARBON (s2pul)  
 Solvent: cdcl3  
 Data collected on: Apr 15 2013

Agilent Technologies

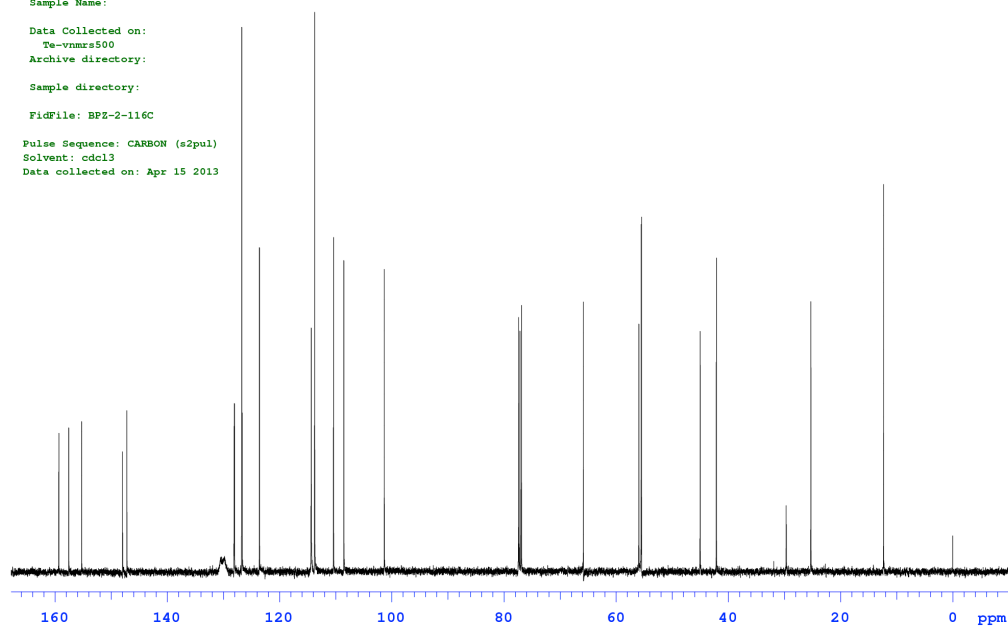

## STANDARD PROTON PARAMETERS

Sample Name:

Data Collected on:  
te.chem.lsa.umich.edu-vnmrs500  
Archive directory:

Sample directory:

FidFile: BPZ-2-135F

Pulse Sequence: PROTON (s2pul)  
Solvent: CDCl3  
Data collected on: Sep 17 2013

Agilent Technologies

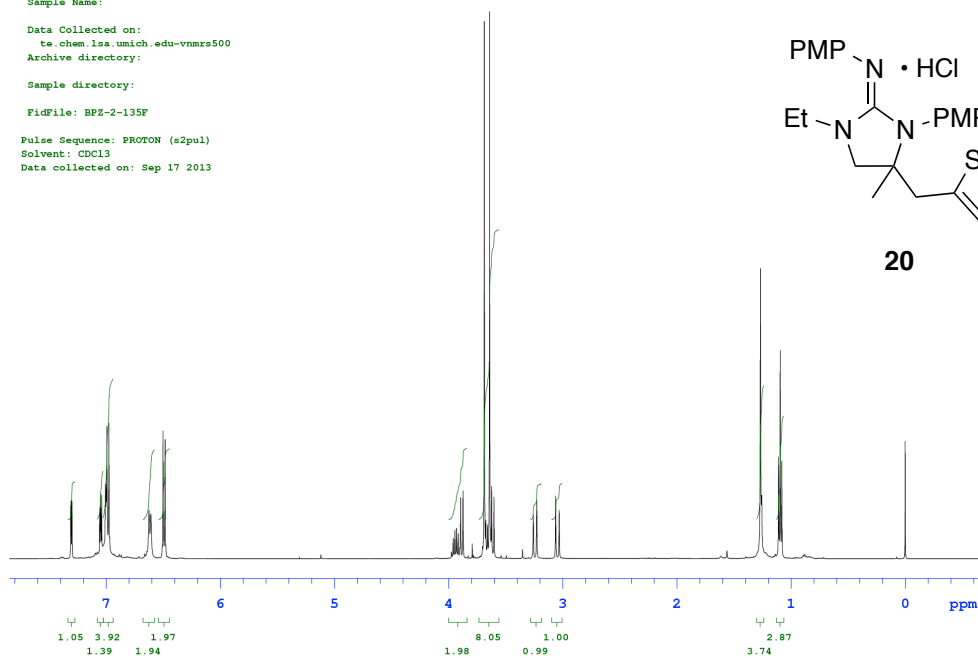

## STANDARD PROTON PARAMETERS

Sample Name:

Data Collected on:  
te.chem.lsa.umich.edu-vnmrs500  
Archive directory:

Sample directory:

FidFile: BPZ-2-135C

Pulse Sequence: CARBON (s2pul)  
Solvent: CDCl3  
Data collected on: Sep 17 2013

Agilent Technologies

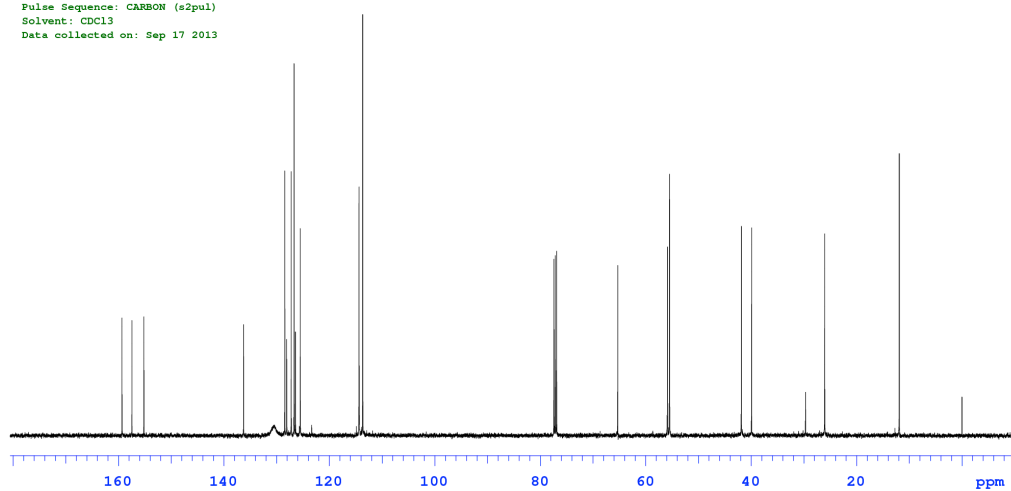

STANDARD 1H OBSERVE - profile

Sample Name:

Data Collected on:

Yb-vnmrs700

Archive directory:

Sample directory:

FidFile: BPZ-2-124AA

Pulse Sequence: PROTON (s2pul)

Solvent: cdcl3

Data collected on: Apr 28 2013

Agilent Technologies

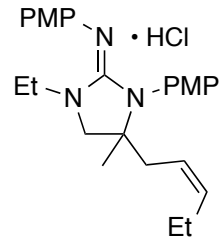

21

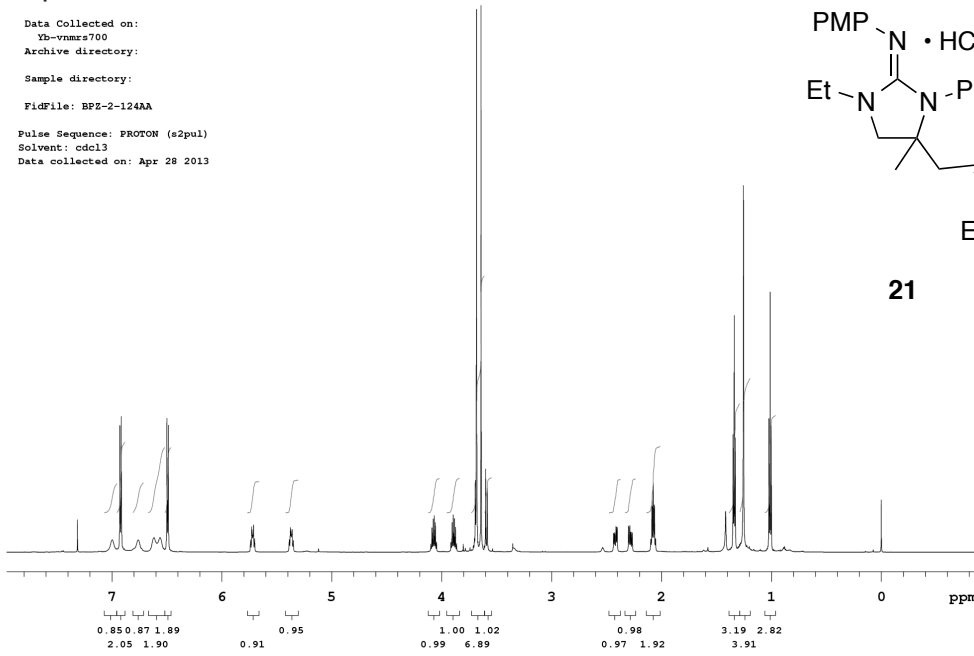

STANDARD 1H OBSERVE - profile

Sample Name:

Data Collected on:

Yb-vnmrs700

Archive directory:

Sample directory:

FidFile: BPZ-2-124C

Pulse Sequence: CARBON (s2pul)

Solvent: cdcl3

Data collected on: Apr 28 2013

Agilent Technologies

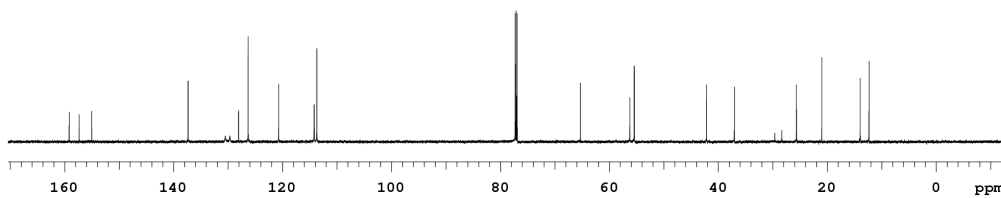

Automated Probe tuning parameter

Sample Name:

Data Collected on:  
yb.chem.lsa.umich.edu-vnmrs700  
Archive directory:

Sample directory:

FidFile: NRB-5-027-1H

Pulse Sequence: PROTON (s2pul)  
Solvent: cdcl3  
Data collected on: Jul 7 2013

Agilent Technologies

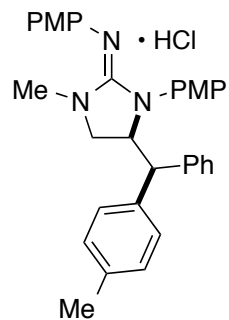

22a

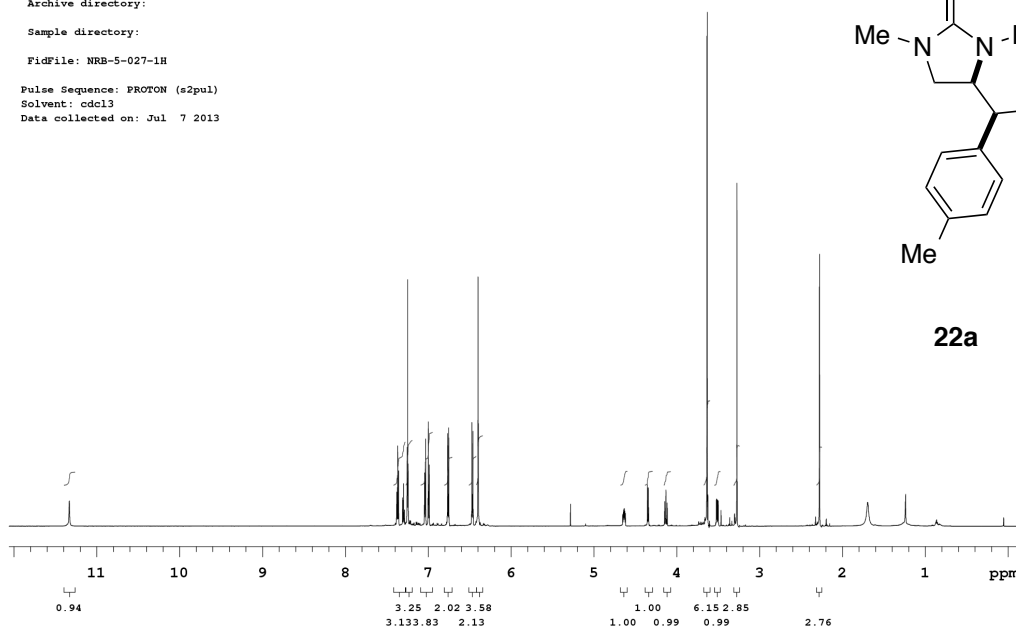

Proton Spectrum

Sample Name:

Data Collected on:  
yb.chem.lsa.umich.edu-vnmrs700  
Archive directory:

Sample directory:

FidFile: NRB-5-027-13C

Pulse Sequence: CARBON (s2pul)  
Solvent: cdcl3  
Data collected on: Jul 7 2013

Agilent Technologies

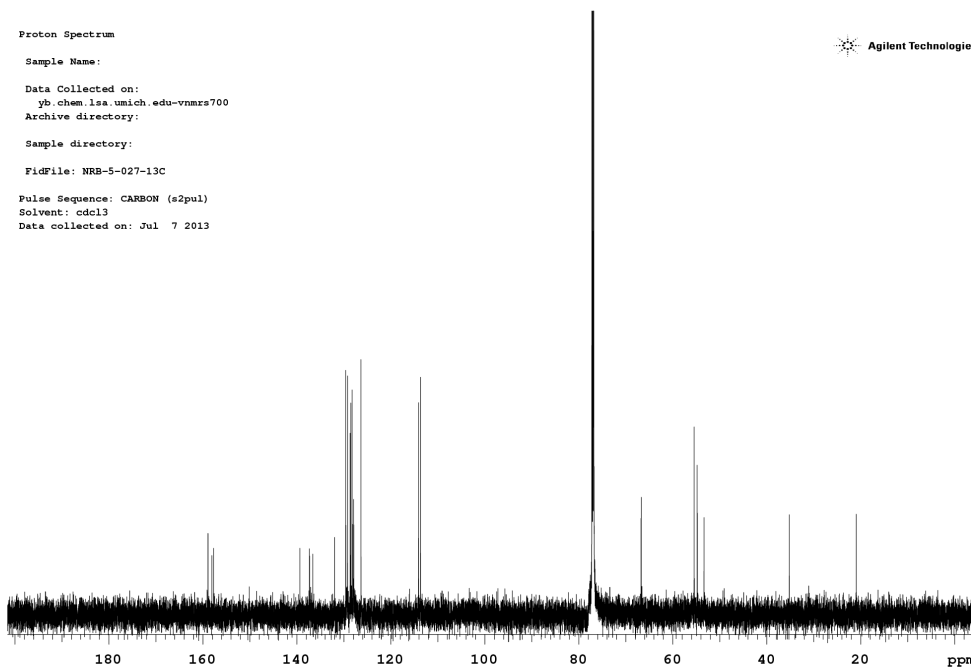

Automated Probe tuning parameter

Sample Name:

Data Collected on:  
yb.chem.lsa.umich.edu-vmrs700  
Archive directory:

Sample directory:

FidFile: NRB-5-058-1H

Pulse Sequence: PROTON (s2pul)  
Solvent: cdcl3  
Data collected on: Aug 4 2013

Agilent Technologies

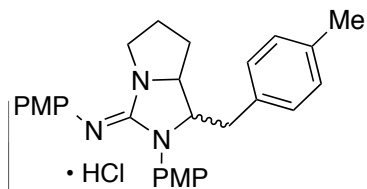

23

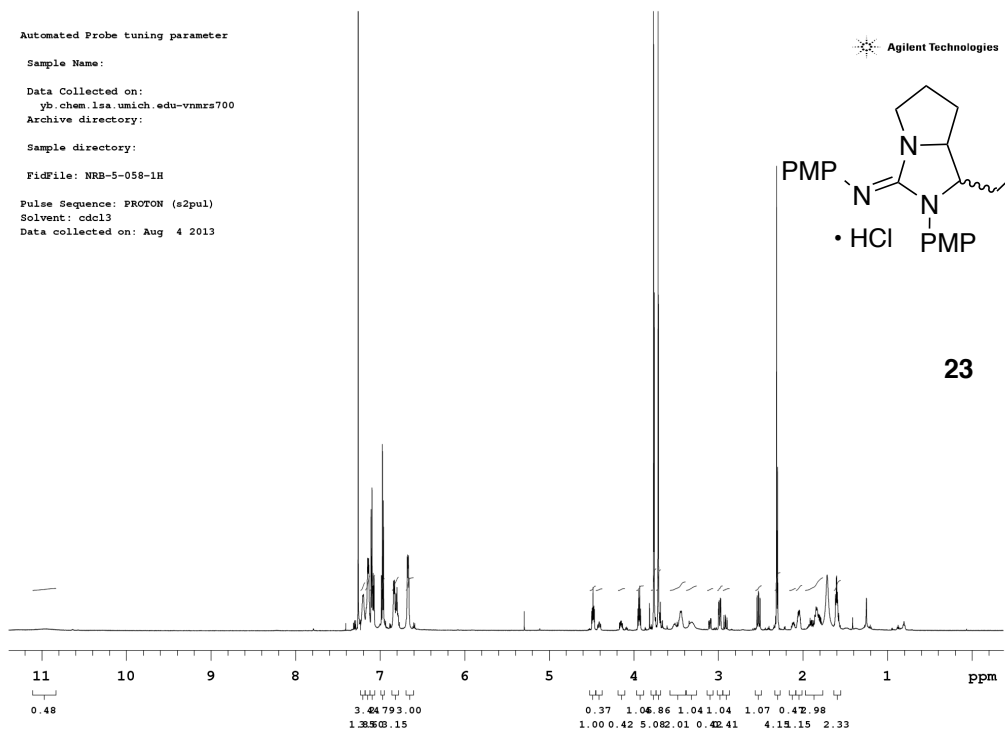

Proton Spectrum

Sample Name:

Data Collected on:  
yb.chem.lsa.umich.edu-vmrs700  
Archive directory:

Sample directory:

FidFile: NRB-5-058-13C

Pulse Sequence: CARBON (s2pul)  
Solvent: cd3od  
Data collected on: Aug 4 2013

Agilent Technologies

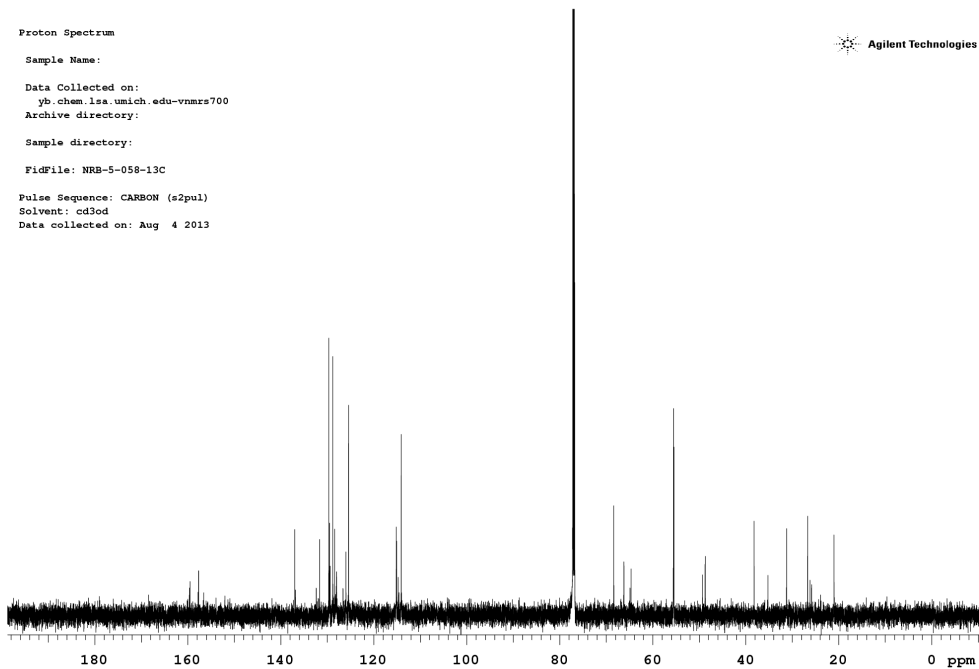

Automated Probe tuning parameter

Sample Name:

Data Collected on:  
yb.chem.lsa.umich.edu-vmrs700  
Archive directory:

Sample directory:

FidFile: NRB-5-058-1H

Pulse Sequence: PROTON (s2pul)  
Solvent: cdcl3  
Data collected on: Aug 7 2013

Agilent Technologies

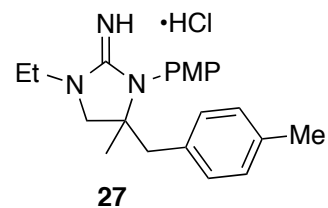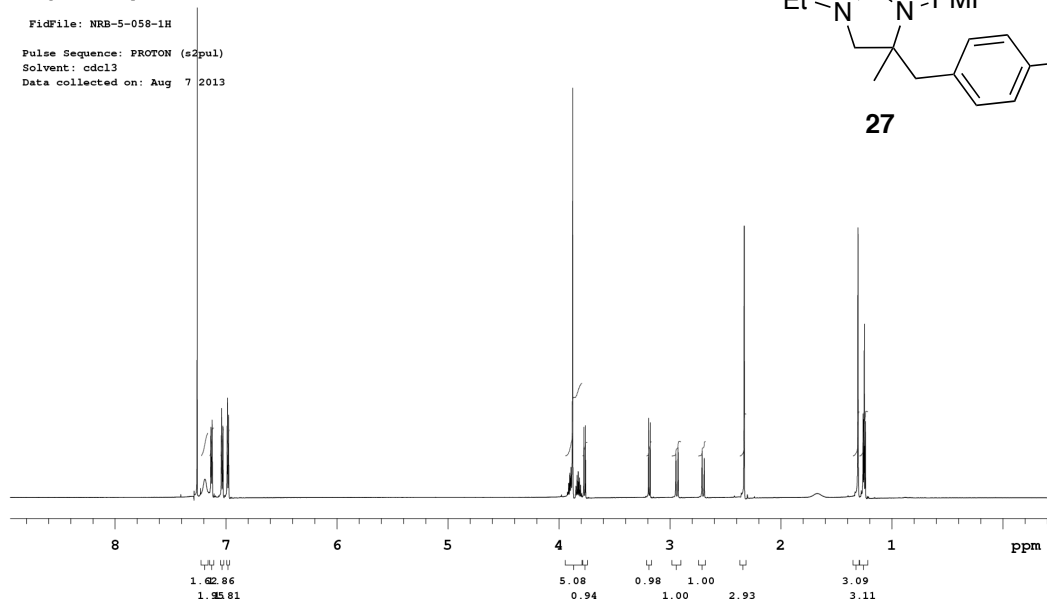

Proton Spectrum

Sample Name:

Data Collected on:  
yb.chem.lsa.umich.edu-vmrs700  
Archive directory:

Sample directory:

FidFile: NRB-5-058-C13

Pulse Sequence: CARBON (s2pul)  
Solvent: cdcl3  
Data collected on: Aug 7 2013

Agilent Technologies

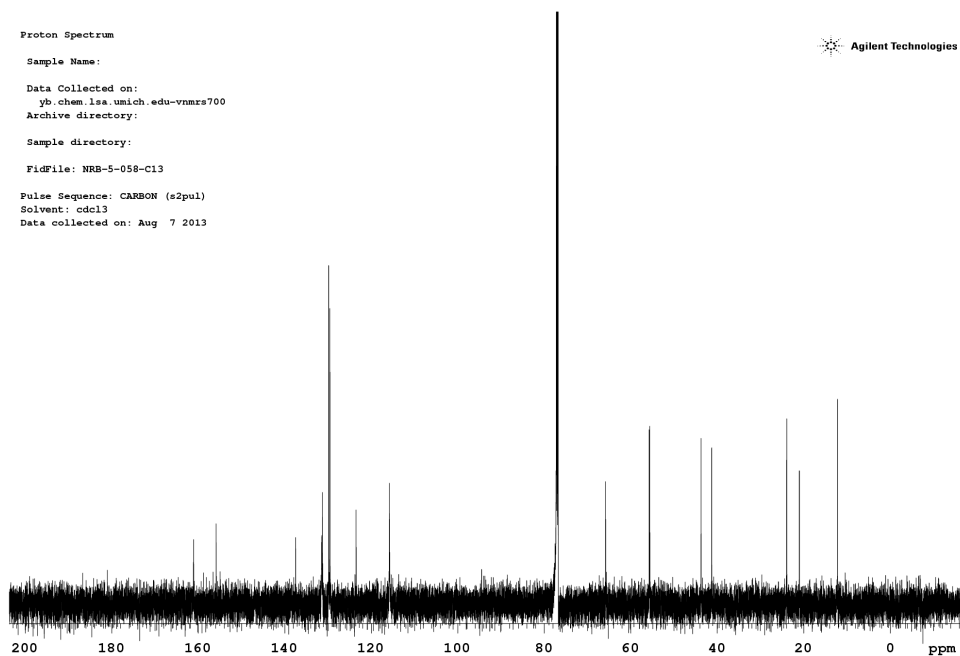



Sample Name:  
 Data Collected on:  
 sn.chem.lsa.umich.edu-inova500  
 Archive directory:  
 Sample directory:  
 FidFile: NRB-5-095-1H  
 Pulse Sequence: PROTON (s2pul)  
 Solvent: cdcl3  
 Data collected on: Sep 28 2013

Agilent Technologies

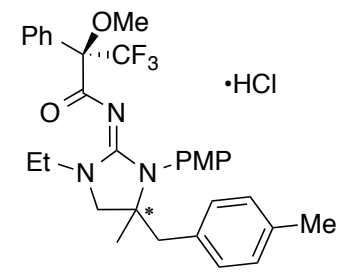

•HCl

S4 via (S)-Phanephos

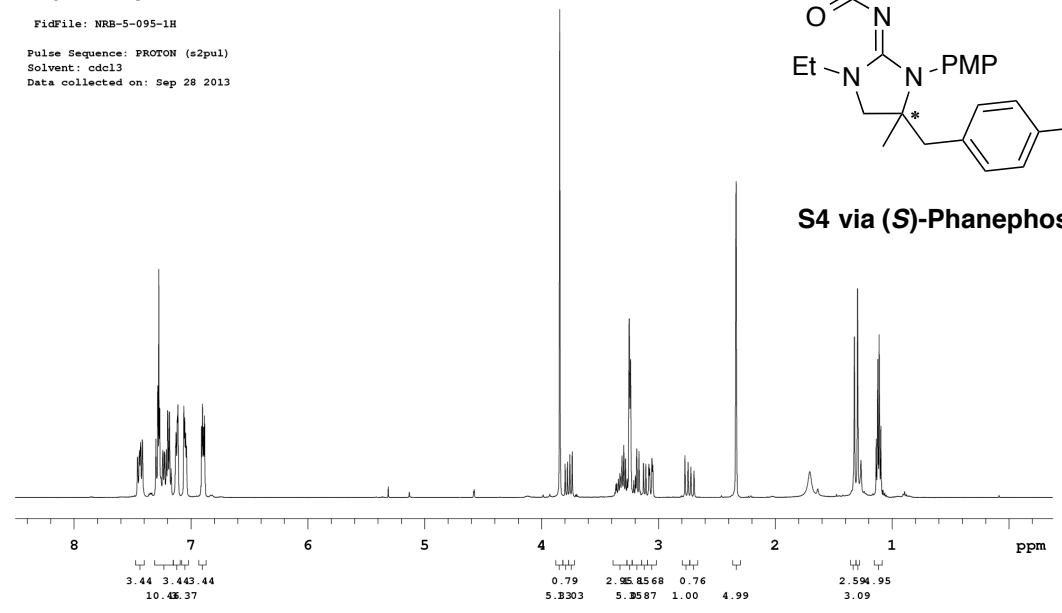

**STANDARD PROTON PARAMETERS**  
 Sample Name:  
 Data Collected on:  
 te.chem.lsa.umich.edu-vnmrs500  
 Archive directory:  
 Sample directory:  
 FidFile: NRB-5-095-13C  
 Pulse Sequence: CARBON (s2pul)  
 Solvent: cdcl3  
 Data collected on: Sep 28 2013

Agilent Technologies

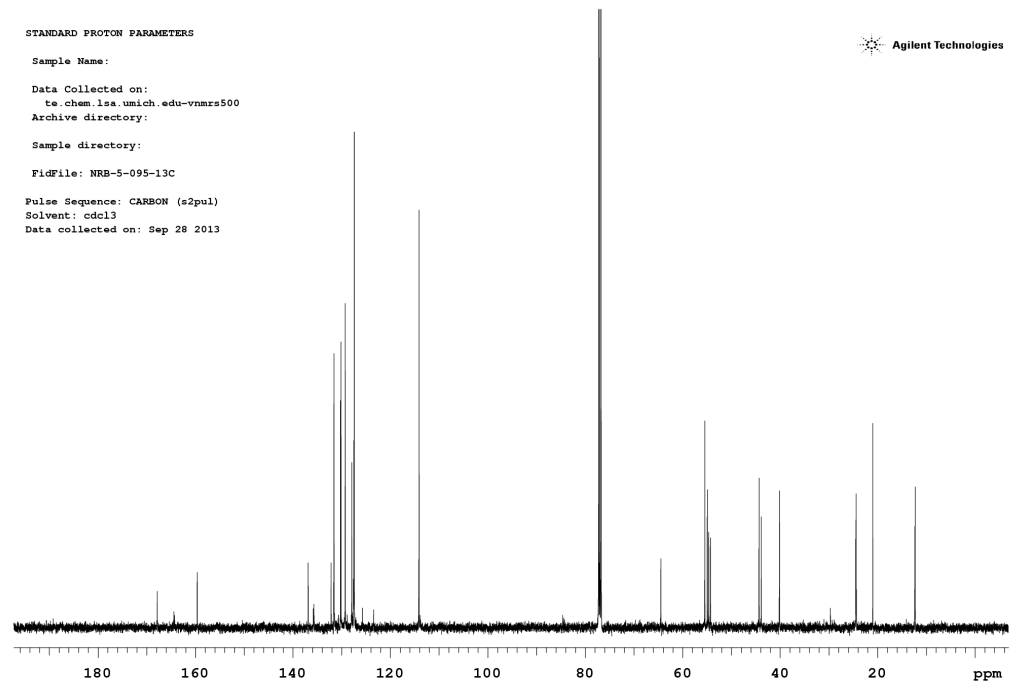

Fluorine-19  
Sample Name:  
Data Collected on:  
co.chem.lsa.umich.edu-vmrs400  
Archive directory:  
Sample directory:  
FidFile: NRB-5-095-19F  
Pulse Sequence: FLUORINE (s2pul)  
Solvent: cdcl3  
Data collected on: Sep 28 2013

Agilent Technologies

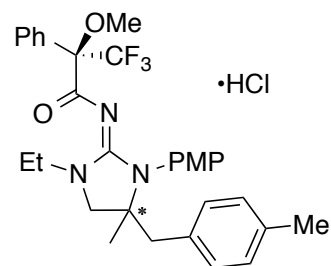

S4 via (S)-Phanephos

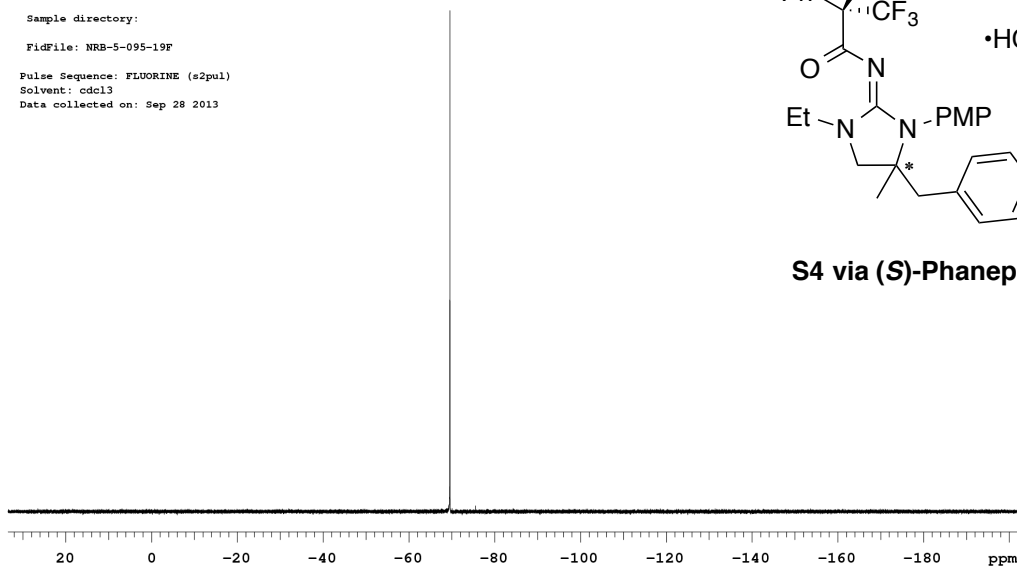

Fluorine-19  
Sample Name:  
Data Collected on:  
co.chem.lsa.umich.edu-vmrs400  
Archive directory:  
Sample directory:  
FidFile: NRB-5-095-19F  
Pulse Sequence: FLUORINE (s2pul)  
Solvent: cdcl3  
Data collected on: Sep 28 2013

Agilent Technologies

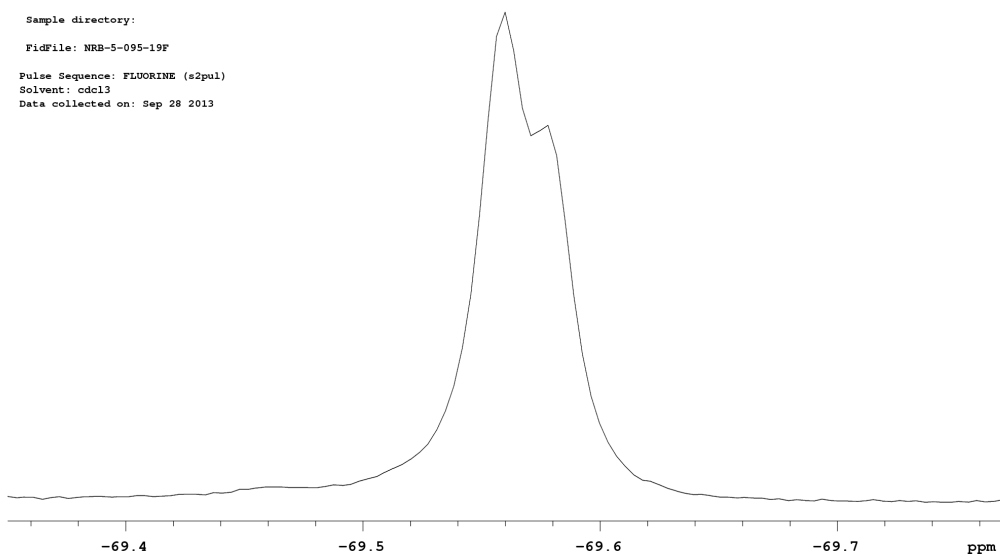

## STANDARD PROTON PARAMETERS

Sample Name:  
 Data Collected on:  
 te.chem.lsa.umich.edu-vmrs500  
 Archive directory:  
 Sample directory:  
 FidFile: NRB-5-099-1H  
 Pulse Sequence: PROTON (s2pul)  
 Solvent: cdcl3  
 Data collected on: Oct 1 2013


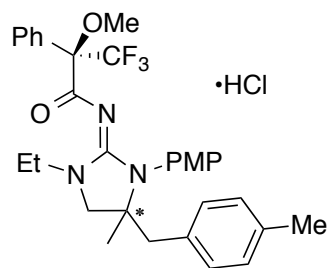

S4 via (S)-BINAP

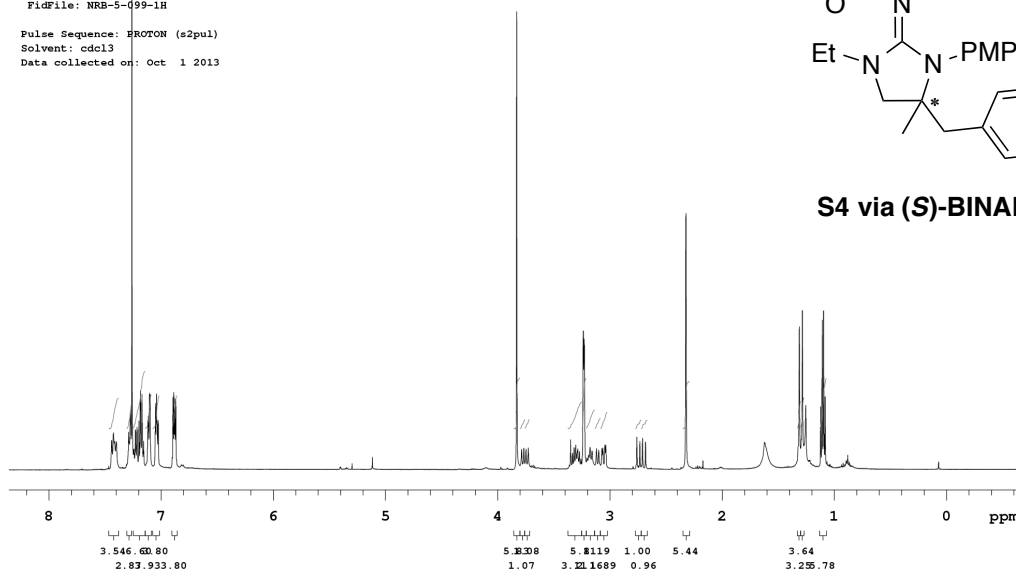

## STANDARD PROTON PARAMETERS

Sample Name:  
 Data Collected on:  
 te.chem.lsa.umich.edu-vmrs500  
 Archive directory:  
 Sample directory:  
 FidFile: NRB-5-099-13C  
 Pulse Sequence: CARBON (s2pul)  
 Solvent: cdcl3  
 Data collected on: Oct 1 2013


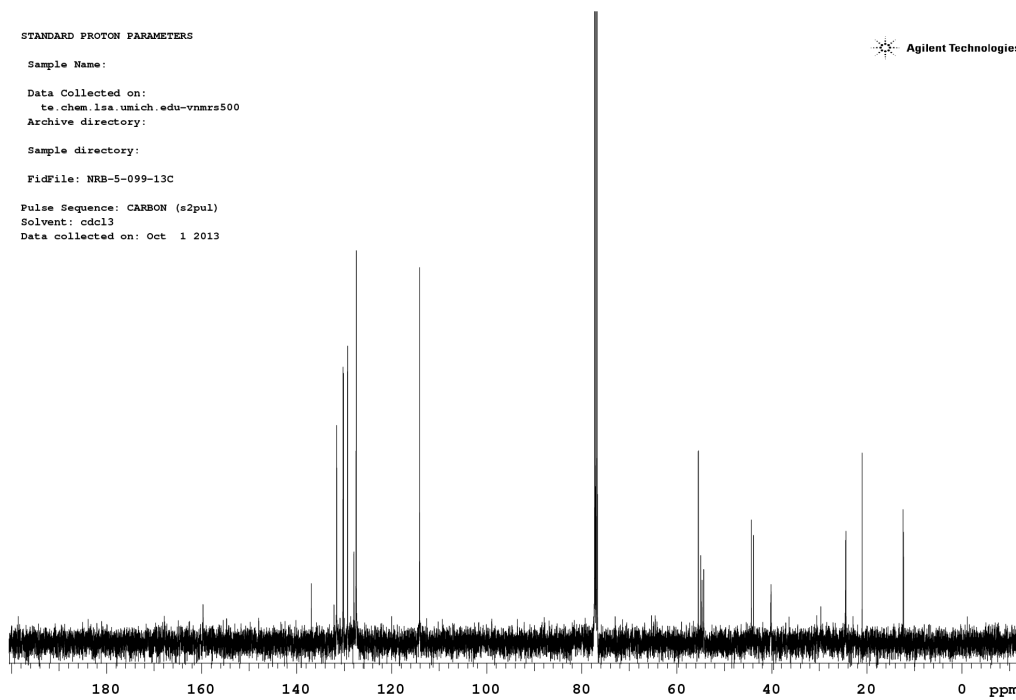

Fluorine-19

Sample Name:

Data Collected on:  
co.chem.lsa.umich.edu-vnmrs400  
Archive directory:

Sample directory:

FidFile: NRB-5-099-19F

Pulse Sequence: FLUORINE (s2pul)  
Solvent: cdcl3  
Data collected on: Oct 1 2013

Agilent Technologies

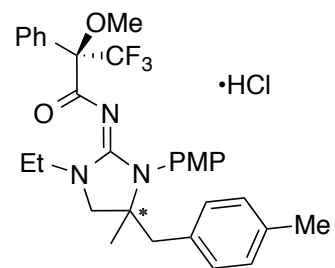

S4 via (S)-BINAP

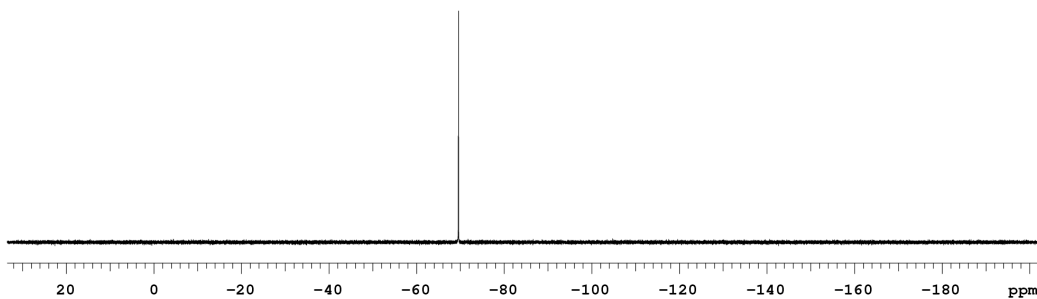

Fluorine-19

Sample Name:

Data Collected on:  
co.chem.lsa.umich.edu-vnmrs400  
Archive directory:

Sample directory:

FidFile: NRB-5-099-19F

Pulse Sequence: FLUORINE (s2pul)  
Solvent: cdcl3  
Data collected on: Oct 1 2013

Agilent Technologies

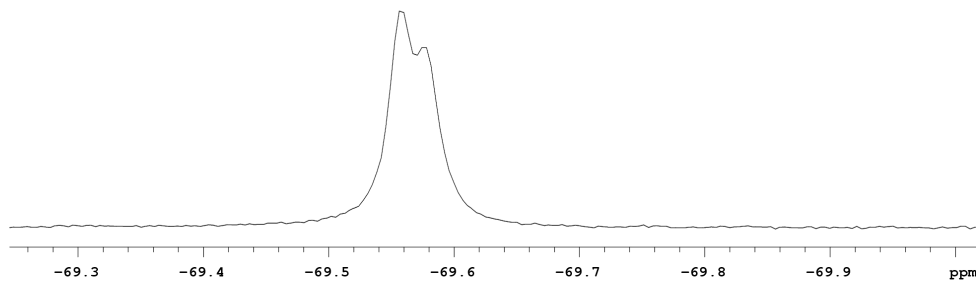

Supplement: NIHMS534157-supplement-1_si_001.pdf [file NIHMS534157-supplement-1_si_001.pdf]
